1 Journal: *Applied and Environmental Microbiology*

2 Section: Physiology

3

4 **Metabolic Flux Hierarchy Prioritizes the Entner-Doudoroff Pathway**  
5 **for Carbohydrate Co-Utilization in *Pseudomonas protegens* Pf-5**

6 **Authors:** Rebecca A. Wilkes<sup>a</sup>, Carroll M. Mendonca<sup>a</sup>, and Ludmilla Aristilde<sup>a,#</sup>

7 **Affiliation:** <sup>a</sup>Department of Biological and Environmental Engineering, College of Agriculture  
8 and Life Sciences, Cornell University, Ithaca, NY 14853, USA

9

10 #Corresponding author:

11 214 Riley-Robb Hall, Cornell University, Ithaca, NY 14850

12 Phone: (607) 255-6845. Fax: (607) 255-4449. E-mail: ludmilla@cornell.edu

13

14 **Running head:** Carbohydrate Metabolism in *Pseudomonas protegens* Pf-5

15 **Keywords:** *Pseudomonas*; co-utilization; metabolic flux analysis; hexose sugar; metabolomics

16

17 **ABSTRACT.** The genetic characterization of *Pseudomonas protegens* Pf-5 was recently  
18 completed. However, the inferred metabolic network structure has not yet been evaluated  
19 experimentally. Here we employed <sup>13</sup>C-tracers and quantitative flux analysis to investigate the  
20 intracellular network for carbohydrate metabolism. Similar to other *Pseudomonas* species, *P.*  
21 *protegens* Pf-5 relied primarily on the Entner-Doudoroff (ED) pathway to connect initial glucose  
22 catabolism to downstream metabolic pathways. Flux quantitation determined that, in lieu of  
23 the direct phosphorylation of glucose by glucose kinase, phosphorylation of oxidized products  
24 of glucose (gluconate and 2-ketogluconate) towards the ED pathway accounted for over 90% of

25 consumed glucose and greater than 35% of consumed glucose was secreted as gluconate and 2-  
26 ketogluconate. Consistent with the lack of annotated pathways for the initial catabolism of  
27 pentoses and galactose in *P. protegens* Pf-5, only glucose was assimilated into intracellular  
28 metabolites in the presence of xylose, arabinose, or galactose. However, when glucose was fed  
29 simultaneously with fructose or mannose, co-uptake of the hexoses was evident but glucose  
30 was preferred over fructose (3 to 1) and over mannose (4 to 1). Despite gene annotation of  
31 mannose catabolism toward fructose 6-phosphate, metabolite labeling patterns revealed that  
32 mannose-derived carbons specifically entered central carbon metabolism via fructose-1,6-  
33 biphosphate, similarly to fructose catabolism. Remarkably, carbons from mannose and  
34 fructose were found to cycle backward through the upper Emden-Meyerhof-Parnas pathway to  
35 feed into the ED pathway. Therefore, the operational metabolic network for processing  
36 carbohydrates in *P. protegens* Pf-5 prioritizes flux through the ED pathway to channel carbons  
37 to downstream metabolic pathways.

38

39 **IMPORTANCE.** Species of the *Pseudomonas* genus thrive in various nutritional environments  
40 and have strong biocatalytic potential due to their diverse metabolic capabilities. Carbohydrate  
41 substrates are ubiquitous both in environmental matrices and in feedstocks for engineered  
42 bioconversion. Here we investigated the metabolic network for carbohydrate metabolism in *P.*  
43 *protegens* Pf-5. Metabolic flux quantitation revealed the relative involvement of different  
44 catabolic routes in channeling carbohydrate carbons through the network. We also uncovered  
45 that mannose catabolism was similar to fructose catabolism, despite the gene annotation of  
46 two different pathways in the genome. Elucidation of the constitutive metabolic network in *P.*  
47 *protegens* is important for understanding its innate carbohydrate processing, thus laying the  
48 foundation for targeting metabolic engineering of this untapped *Pseudomonas* species.

49

## 50 INTRODUCTION

51 Species of the genus *Pseudomonas*, which are ubiquitous in the environment, are metabolically  
52 diverse and often used for industrial bioproduction (1). Elucidating the native network of  
53 carbon fluxes through metabolic pathways is critical to the engineering of these bacterial  
54 species to optimize their use in agriculture, industry, and medicine. Gaining importance in  
55 bioremediation, *P. protegens* Pf-5 was identified to produce enzymes that degrade  
56 polyurethane, a plastic polymer (2). Furthermore, *P. protegens* Pf-5 is also known to synthesize  
57 and release several antimicrobials and exoenzymes that are toxic to plant pathogens (3–6).  
58 Recently, *P. protegens* Pf-5 was characterized and annotated at the genomic level (7). However,  
59 the metabolic network of *P. protegens* Pf-5 has only been inferred from genome annotation  
60 and has not yet been investigated experimentally.

61 Given the importance and ubiquity of carbohydrate-containing feedstocks, we seek to  
62 unravel the metabolic network structure for carbohydrate metabolism in *P. protegens* Pf-5 by  
63 combining <sup>13</sup>C-assisted cellular carbon mapping with <sup>13</sup>C metabolic flux analysis (MFA). Previous  
64 studies on other *Pseudomonas* species (i.e. *P. putida*, *P. fluorescens*) have focused on  
65 elucidating metabolic fluxes during growth on glucose, a prototypical carbohydrate substrate  
66 (8–11). In a similar fashion, we also studied here the innate carbohydrate metabolism in *P.*  
67 *protegens* Pf-5 during feeding on glucose alone. However, carbon feedstocks are typically  
68 composed of other carbohydrates in addition to glucose. Therefore, we also investigated  
69 carbon assimilation and fluxes when the *P. protegens* Pf-5 cells were fed on mixtures of glucose  
70 with other hexoses (mannose, fructose, and galactose) or pentoses (xylose and arabinose).

71 Previous reports showed that *P. protegens* strains were able to grow on glucose, mannose,  
72 or fructose as a single carbon source, but not on galactose, xylose, or arabinose (6). In the

73 genome of *P. protegens* Pf-5, the genes for the following transporters were encoded: a  
74 phosphoenolpyruvate (PEP):sugar phosphotransferase system (PTS) for fructose uptake (and  
75 possibly for mannose uptake) and ATP-binding cassette (ABC) transporters for glucose,  
76 mannose, galactose, and xylose (Fig. 1; Table S1) (7). Characteristically in *Pseudomonas* species,  
77 glucose metabolism involves a peripheral pathway in the periplasm wherein glucose  
78 dehydrogenase converts glucose to gluconate and gluconate 2-dehydrogenase converts  
79 gluconate to 2-ketogluconate (Fig. 1) (8). Fluxes through these oxidation reactions were found  
80 to maximize growth on glucose (8). After active transport into the cytoplasm, the oxidized  
81 products of glucose are phosphorylated to 6-phosphogluconate (6P-gluconate) and  
82 subsequently routed to the Entner-Doudoroff (ED) pathway or the pentose phosphate (PP)  
83 pathway (Fig. 1) (8, 10, 11). Previous studies with other *Pseudomonas* species have also  
84 determined that the forward Embden-Meyerhof-Parnas (EMP) pathway is not possible due to  
85 the absence of 6-phosphofructokinase to convert fructose 6-phosphate (F6P) to fructose 1,6-  
86 biphosphate (FBP) (Fig. 1) (1, 7, 10). Therefore, to route glucose-derived carbons eventually  
87 downstream towards biosynthetic pathways and the tricarboxylic acid (TCA) cycle, the ED  
88 pathway is required wherein 6P-gluconate is cleaved to produce pyruvate and glyceraldehyde  
89 3-phosphate (GAP) (Fig. 1). The gene that encodes 6-phosphofructokinase is also absent in *P.*  
90 *protegens* Pf-5 (7), thus the ED pathway is assumed to be the required route for glucose  
91 metabolism in *P. protegens* Pf-5. However, the extent to which the peripheral pathway of  
92 glucose oxidation contributes to initial glucose catabolism compared to direct glucose  
93 phosphorylation in *P. protegens* Pf-5 remains to be determined.

94 In contrast to glucose, fructose is transported through the PTS, which uses the phosphate  
95 group from PEP to phosphorylate fructose to fructose-1-phosphate (F1P) followed by a  
96 subsequent phosphorylation step by 1-phosphofructokinase to convert F1P to FBP (Fig. 1) (9),

97 12, 13). Previous studies on other *Pseudomonas* species (*P. fluorescens*, *P. putida*, *P.*  
98 *aeruginosa*, *P. stutzeri*, and *P. acidovorans*) reported that fructose-derived carbons were cycled  
99 back via a reverse flux through upper EMP pathway (FBP up to G6P) to be connected to the ED  
100 pathway (12, 14–16). However, according to the genome of *P. protegens* Pf-5, FBP could also be  
101 subjected to the last step of the EMP pathway wherein FBP can be lysed directly to two triose-  
102 phosphates, GAP and dihydroxyacetone-3-phosphate (DHAP) (Fig. 1) (7). Whether the  
103 preferential route for fructose assimilation during simultaneous feeding on glucose is via the  
104 lower EMP pathway or through the reverse cycling of carbons from FBP to ED pathway remains  
105 to be determined. The catabolic routing of FBP has important energetic implications for *P.*  
106 *protegens* Pf-5. Compared to the direct lysis through the forward EMP pathway, the  
107 combination of reverse flux through upper EMP pathway with the ED pathway maintains the  
108 same quantity of reduced equivalents (i.e., NAD(P)H) but half the ATP yield.

109 With respect to initial mannose catabolism, a previous study with *P. aeruginosa* proposed  
110 two possible routes, which involve either mannose isomerization to fructose followed by  
111 subsequent phosphorylation to FBP or direct phosphorylation of mannose to mannose 6-  
112 phosphate (M6P) prior to isomerization to F6P (17, 18). Relevant to the first route, an  
113 intracellular mannose isomerase (EC 5.3.1.7) was reported in *P. cepacia* and *P. saccharophila*  
114 (19, 20), but the gene for this enzyme was not annotated in the *P. protegens* Pf-5 genome (7).  
115 On the other hand, albeit not yet confirmed by metabolic studies, the genes for the relevant  
116 enzymes in the second catabolic route, i.e. the conversion of mannose to F6P, were annotated  
117 in the *P. protegens* Pf-5 genome (Fig. 1).

118 The presence of the annotated genes for transketolase and transaldolase enzymes implied  
119 a fully functional PP pathway in *P. protegens* Pf-5 (7). Both oxidative and non-oxidative routes  
120 of the PP pathway are important to channel carbohydrate-derived metabolite precursors to the

121 biosynthesis of ribonucleotides and aromatic amino acids. Regarding xylose catabolism, despite  
122 the annotation of a ribose transporter that could be used as a possible xylose transporter, the  
123 genes encoding the enzymes (xylose isomerase and xylulose kinase) responsible for introducing  
124 xylose into the PP pathway were not present in *P. protegens* Pf-5 (Fig. 1) (7). Moreover, the  
125 collective enzymes needed for the alternative route for xylose through the Weimberg pathway,  
126 which incorporates xylose through xylonate into  $\alpha$ -ketoglutarate, were not all present in the  
127 genome of *P. protegens* Pf-5 (7). Regarding arabinose catabolism, there was no annotated  
128 pathway for the assimilation of arabinose in *P. protegens* Pf-5 (Fig. 1) (7). Despite the lack of the  
129 genes for xylose catabolism, a recent study reported extracellular xylose depletion by *P.*  
130 *protegens* Pf-5 during growth on a mixture of carbohydrates (21). Whether arabinose or xylose  
131 is incorporated into cellular metabolism, specifically the PP pathway, in the presence of another  
132 carbohydrate remains to be determined.

133 Here we applied liquid chromatography (LC) with high-resolution mass spectrometry  
134 (HRMS) to perform a  $^{13}\text{C}$ -assisted metabolomics investigation during growth of *P. protegens* Pf-  
135 5 on glucose alone or simultaneously with fructose, mannose, galactose, xylose, or arabinose.  
136 We provide the first quantitative evaluation of the hypothetical metabolic network of *P.*  
137 *protegens* Pf-5 deduced from its genome-level characterization. First, we employed carbon  
138 mapping to identify the specific pathways that channel glucose-derived carbons throughout  
139 cellular metabolism. Second, we performed quantitative analysis to determine energetic yields  
140 from the cellular metabolism in *P. protegens* Pf-5. Third, we determined which carbohydrates  
141 can be co-assimilated with glucose in *P. protegens* Pf-5 and subsequently quantified the  
142 metabolic fluxes when co-utilization occurred. Our findings provide new metabolic insights,  
143 which both resolve discrepant metabolic predictions from genome annotation and quantify  
144 fluxes in the metabolic network structure for carbohydrate processing in *P. protegens* Pf-5.

145

## 146 RESULTS

### 147 Physiological Parameters of *P. protegens* Pf-5 Grown on Carbohydrate Mixtures. We

148 investigated the growth phenotype of *P. protegens* during feeding on different hexose  
149 combinations. Our growth rates were in close agreement with reported values for glucose-  
150 grown *P. putida* ( $0.56 \pm 0.02 \text{ h}^{-1}$ ) and *P. fluorescens* ( $0.49 \pm 0.03 \text{ h}^{-1}$ ) (8, 22). At a total carbon  
151 equivalence of 100 mM C, the growth rate of cells fed on glucose alone ( $0.56 \pm 0.09 \text{ h}^{-1}$ ) was  
152 similar to the growth rate of cells fed on a 1:1 mixture of glucose and fructose ( $0.52 \pm 0.06 \text{ h}^{-1}$ )  
153 or glucose and mannose ( $0.50 \pm 0.04 \text{ h}^{-1}$ ) (Fig. 2A; Fig. S1; Table S2). We also found that the  
154 growth rate remained relatively unchanged when the cells were grown on 50 mM C glucose  
155 alone ( $0.47 \pm 0.02 \text{ h}^{-1}$ ) (Fig. 2A). Therefore, *P. protegens* would not be subjected to carbon  
156 limitation during growth on carbohydrate mixtures if either fructose or mannose was not  
157 assimilated from the mixture with glucose (Fig. 2A).

158 We monitored substrate consumption by *P. protegens* Pf-5 cells by tracking the depletion  
159 of the carbohydrates from the extracellular medium (Fig. 2B; Table S2). The glucose-grown cells  
160 depleted glucose completely over a 10 h period (Fig. 2B). Over the same period of time, the  
161 cells grown on the mixture of glucose and mannose depleted both substrates completely but  
162 cells grown on the mixture of glucose and fructose depleted glucose completely and fructose  
163 partially (Fig. 2B). We also observed that, during growth of *P. protegens* Pf-5 on the  
164 glucose:mannose mixture, fructose appeared in the extracellular medium about 1 h after  
165 mannose consumption started (Fig. 2A). The appearance of extracellular fructose implied the  
166 presence of mannose isomerase, which was responsible for converting mannose to fructose in  
167 other *Pseudomonas* species (19,20) (Fig. 2B). During growth on both hexose mixtures, glucose  
168 was consumed faster and depleted by 6 h of growth, at which time about 30% of the fructose

169 was consumed but only 10% of mannose was taken up by the cells (Fig 2B). Quantification of  
170 the consumption rates during exponential growth determined that fructose consisted 22% of  
171 the total carbon uptake and mannose consisted of 20% of total carbon uptake (Table S2). Thus,  
172 during hexose co-utilization under both of our experimental conditions, glucose acts as the  
173 major carbon source for cellular metabolism.

174 We also monitored the extracellular overflow of metabolic products, a phenomenon that is  
175 widely reported in *Pseudomonas* species (8, 11, 23). Both oxidized products of glucose (i.e.,  
176 gluconate and 2-ketogluconate) and the organic acid pyruvate were found in appreciable levels  
177 (above 0.001 mM) in the extracellular medium (Fig. 2C). Secretions of gluconate and 2-  
178 ketogluconate were also reported with *P. putida* (8, 11) and *P. fluorescens* (23); pyruvate  
179 secretion was also reported in *P. fluorescens* (23). The levels of these secreted metabolites  
180 were dependent on substrate composition in the growth medium of *P. protegens*. The highest  
181 secretions of gluconate and 2-ketogluconate (greater than 2 mM) were measured in the  
182 medium when cells were grown on glucose alone or glucose with fructose. By contrast, during  
183 growth on the glucose:mannose mixture, the highest secretion of gluconate and 2-  
184 ketogluconate decreased substantially, by ~40% and ~85%, respectively (Fig. 2C; Table S2).  
185 Compared to gluconate and 2-ketogluconate, pyruvate was secreted in smaller amounts ( $\mu\text{M}$   
186 range), with the highest secretion ( $0.13 \pm 0.08$  mM) obtained when cells were grown on glucose  
187 alone (Fig. 2C; Table S2).

188

189 **Metabolic Pathways and Fluxes in Glucose-Fed Cells.** Isotopic enrichment with [1,2- $^{13}\text{C}_2$ ]-  
190 glucose was used to determine the metabolic network structure through initial glucose  
191 catabolism, the EMP pathway, the ED pathway, the PP pathway, and the TCA cycle (Fig. 3). At  
192 two timepoints during exponential growth, we obtained similar metabolite  $^{13}\text{C}$ -labeling



193 patterns, which confirmed pseudo-steady state isotopic enrichment (Fig. 3). To elucidate fluxes  
194 through 48 reactions in the metabolic pathway, we combined the metabolite labeling data with  
195 substrate consumption rates (accounting for excretion of gluconate and 2-ketogluconate) and  
196 biomass growth rates (Fig. 4A; Fig. S2; Table S3; Table S4). Adjusting for the carbon loss through  
197 metabolite secretions, about 64% of the glucose consumed from the extracellular medium was  
198 available for intracellular catabolism in *P. protegens* Pf-5. Very close alignment between the  
199 MFA-estimated labeling patterns and those determined experimentally reflected the quality of  
200 the optimization procedure for the model cellular fluxes (Fig. S3).

201 *Involvement of glucose oxidation and the ED pathway.* Glucose catabolism can be initiated  
202 via three different routes: direct phosphorylation to G6P, oxidation to gluconate in the  
203 periplasm before phosphorylation to 6P-gluconate, or additional periplasmic oxidation of  
204 gluconate to 2-ketogluconate before phosphorylation to 6P-gluconate (Fig. 1). Doubly <sup>13</sup>C-  
205 labeled 6P-gluconate (86-89%) and doubly <sup>13</sup>C-labeled G6P (~63%) were both consistent with  
206 the assimilation of [1,2-<sup>13</sup>C<sub>2</sub>]-glucose (Fig. 3A). In accordance with the ED pathway wherein the  
207 first three carbons of 6P-gluconate become the doubly <sup>13</sup>C-labeled pyruvate and the last three  
208 nonlabeled carbons become GAP, pyruvate was 50-53% doubly <sup>13</sup>C-labeled and DHAP (an  
209 isomer of GAP) was over 95% nonlabeled (Fig. 3A). The 37-38% nonlabeled fraction of pyruvate  
210 was indicative of the nonlabeled fractions of precursor metabolites downstream of GAP (Fig.  
211 3A). In the absence of the 6-phosphofructokinase enzyme in *P. protegens* Pf-5 and thus the lack  
212 of the traditional forward EMP pathway (7), the nonlabeled GAP and DHAP combined to  
213 produce the highly nonlabeled FBP (85-87%), which then cycled backward through upper EMP  
214 to result in the 67-70% nonlabeled F6P and 31% nonlabeled G6P (Fig. 3A). The MFA quantified  
215 the relative contribution of the three assimilation routes for the glucose carbons in *P. protegens*  
216 Pf-5 (Fig 4A). Only ~5% of the glucose uptake was directly converted to G6P in the cytosol,

217 whereas up to 95.2% of glucose was oxidized to gluconate accompanied by another flux (12.7%)  
218 toward 2-ketogluconate (Fig. 4A). Following the phosphorylation of the oxidized products of  
219 glucose to 6P-gluconate, our MFA determined that the flux through the ED pathway was 67.2%  
220 of the glucose uptake rate in *P. protegens* Pf-5 (Fig. 4A).

221 *Oxidative versus non-oxidative PP pathway.* Following a decarboxylation reaction through  
222 the oxidative PP pathway, doubly  $^{13}\text{C}$ -labeled 6P-gluconate would become singly  $^{13}\text{C}$ -labeled  
223 Ru5P, which would introduce singly  $^{13}\text{C}$ -labeled fractions into metabolites in the PP pathway  
224 (Fig. 3B). Thus, singly  $^{13}\text{C}$ -labeled fractions of xylulose 5-phosphate (Xu5P) (21-25%), ribose 5-  
225 phosphate (R5P) (22-25%), and sedoheptulose 7-phosphate (S7P) (20-23%) were due to flux  
226 through the oxidative PP pathway (Fig. 3B). However, by involving nonlabeled metabolites from  
227 downstream of the ED pathway, the non-oxidative PP pathway introduced relatively higher  
228 nonlabeled fractions of Xu5P (64-67%), R5P (65-69%), and S7P (62-69%) (Fig. 3B). Accordingly,  
229 the MFA determined an oxidative flux to the PP pathway (about 0.5%), which was a tenth of the  
230 non-oxidative PP pathway fluxes (5.1%) from ketolase and transaldolase reactions (Fig. 3B and  
231 4A). As a precursor to both the oxidative PP pathway and the ED pathway, 6P-gluconate  
232 represents an important branch point in metabolism. Therefore, the low contribution of 6P-  
233 gluconate to the oxidative PP pathway necessitated a reverse flux from downstream ED  
234 pathway to the upper EMP pathway (i.e. gluconeogenesis) to channel glucose-derived carbons  
235 towards the PP pathway in support of biomass growth (Fig. 4A).

236 *Downstream metabolic pathways.* The  $^{13}\text{C}$ -labeling patterns of TCA cycle intermediates  
237 were consistent with the established route of carbon flow through this pathway (Fig. 3C). The  
238 decarboxylation of pyruvate generated nonlabeled and singly  $^{13}\text{C}$ -labeled acetyl moieties in  
239 acetyl-CoA, which were subsequently incorporated into the TCA cycle by combining with  
240 oxaloacetate (OAA) (nonlabeled, singly, doubly, and minorly triply  $^{13}\text{C}$ -labeled) to produce

241 citrate (nonlabeled, singly, doubly, triply, and minorly quadruply  $^{13}\text{C}$ -labeled) (Fig 3C). The two  
242 sequential decarboxylation reactions in the TCA cycle led to the disappearance of the quadruply  
243  $^{13}\text{C}$ -labeled fraction in citrate and, thereafter, the triply  $^{13}\text{C}$ -labeled fraction in  $\alpha$ -ketoglutarate  
244 (Fig. 3C). The resulting succinate labeling pattern (nonlabeled, singly, and doubly  $^{13}\text{C}$ -labeled)  
245 led to a similar labeling scheme through fumarate, malate, and OAA (Fig. 3C). The MFA  
246 obtained a substantial flux (above 70% of the glucose uptake) through the TCA cycle from OAA  
247 around to malate (Fig. 4A).

248 Anaplerotic reactions contributed to the triply  $^{13}\text{C}$ -labeled OAA (Fig. 3C). The  
249 aforementioned decarboxylation reactions in the TCA cycle contributed to the  $^{13}\text{C}$ -labeled  
250 carbon dioxide ( $\text{CO}_2$ ) pool, which was calculated to be about 37-39% of the total dissolved  $\text{CO}_2$   
251 (Fig. 3; Fig. S4). The carboxylation of doubly  $^{13}\text{C}$ -labeled pyruvate or doubly  $^{13}\text{C}$ -labeled PEP with  
252  $^{13}\text{C}$ -labeled  $\text{CO}_2$  would generate triply  $^{13}\text{C}$ -labeled OAA (Fig. 3C). Notably, singly  $^{13}\text{C}$ -labeled OAA  
253 can be formed from carboxylation reactions of nonlabeled pyruvate or PEP with singly  $^{13}\text{C}$ -  
254 labeled  $\text{CO}_2$  (Fig. 3C). The singly  $^{13}\text{C}$ -labeled OAA can also be formed from singly  $^{13}\text{C}$ -labeled  
255 malate through the traditional TCA pathway utilizing malate dehydrogenase (Fig. 3C). The  
256 relative contributions of the different precursors to OAA (i.e., pyruvate/PEP versus malate) in *P.*  
257 *protegens* Pf-5 was resolved with the MFA, which demonstrated a substantially higher  
258 fractional flux of pyruvate to OAA (70%) than the flux of malate to OAA through malate  
259 dehydrogenase (7.7%) (Fig. 4A). This low flux through malate dehydrogenase was accompanied  
260 by a high flux for the direct conversion of malate to pyruvate (63.4%), thus highlighting a very  
261 active pyruvate shunt in *P. protegens* Pf-5 (Fig. 4A). The  $^{13}\text{C}$ -labeling patterns of TCA cycle  
262 metabolites implied an inactive glyoxylate shunt, which bypasses the decarboxylation reactions  
263 in the canonical TCA cycle to produce malate and succinate from citrate (Fig. S5). Specifically,

264 there was a lack of triply  $^{13}\text{C}$ -labeled succinate which would be produced from triply and  
265 quadruply  $^{13}\text{C}$ -labeled citrate through the glyoxylate shunt (Fig. S5).

266 *Energetics of glucose catabolism.* We compared the energetic yields [reduced ubiquinone  
267 (UQH<sub>2</sub>), NAD(P)H, and ATP] from central carbon metabolism between our MFA-based cellular  
268 fluxes in *P. protegens* Pf-5 and those previously reported for *P. putida* KT2440, a well-studied  
269 biocatalyst candidate (10) (Fig. 4B). Compared to *P. putida* KT2440 (10), there was a slightly  
270 higher flux (about 5% higher) from glucose to gluconate in *P. protegens* Pf-5 but the flux from  
271 malate to OAA was lower (by about 25%) in *P. protegens* Pf-5. Accordingly, there was a higher  
272 yield of UQH<sub>2</sub> from initial glucose catabolism in *P. protegens* Pf-5 but a higher UQH<sub>2</sub> yield from  
273 the TCA cycle in *P. putida* KT2440 (Fig. 4B). Regarding the yield of NAD(P)H, there was a higher  
274 contribution from the TCA cycle (by about 3%) and from the oxidative PP pathway (by about  
275 60%) in *P. putida* KT2440 than in *P. protegens* Pf-5 but the contribution of the anaplerotic  
276 reaction from malate to pyruvate was lower (by about 81%) in *P. putida* KT2440 than in *P.*  
277 *protegens* Pf-5 (Fig. 4B). With respect to ATP production by substrate-level phosphorylation, *P.*  
278 *protegens* Pf-5 produced less (by about 3 mmol ATP/g<sub>CDW</sub>) than *P. putida* KT2440 due to the  
279 relatively lower fluxes in the downstream ED pathway of *P. protegens* (10) (Fig. 4). However,  
280 the net ATP yield was similar because *P. protegens* Pf-5 consumed less ATP than *P. putida*  
281 KT2440 in initial glucose catabolism due to the higher flux for the glucose oxidation to  
282 gluconate and 2-ketogluconate and accounting for the subsequent carbon loss through  
283 secretions of these oxidized products in *P. protegens* Pf-5 (10) (Fig. 4). In sum, despite the  
284 different contributions of the relevant metabolic pathways, the combination of these  
285 contributions led to nearly equivalent net energetic yields in *P. protegens* Pf-5 and *P. putida*  
286 KT2440 (Fig. 4B).

287

## 288 **Hierarchy of Glucose Metabolism in the Presence of Other Carbohydrates.**

289 *Proof of concept with <sup>13</sup>C-labeled glucose and unlabeled glucose.* Before determining the  
290 relative incorporation of [U-<sup>13</sup>C<sub>6</sub>]-glucose in the presence of a nonlabeled carbohydrate (xylose,  
291 arabinose, galactose, fructose, or mannose), we first conducted proof-of-concept experiments  
292 with the cells grown on [U-<sup>13</sup>C<sub>6</sub>]-glucose alone or in a 1:1 mixture with unlabeled glucose (Fig. 5;  
293 Fig. 6) (24). By comparative analysis with the metabolite labeling patterns in the latter two  
294 conditions, we seek to determine the relative incorporation of other unlabeled carbohydrates  
295 in the presence of [U-<sup>13</sup>C<sub>6</sub>]-glucose (Fig. 5; Fig. 6).

296 *Glucose with xylose, arabinose, or galactose.* While galactose, xylose, and arabinose are  
297 reported to not be metabolized as single substrates in *P. protegens* Pf-5 (6), whether they are  
298 metabolized in the presence of glucose needed to be evaluated. During growth on <sup>13</sup>C-labeled  
299 glucose and galactose, the labeling patterns of metabolites in the EMP and ED pathways (F6P,  
300 FBP, DHAP) were identical to the metabolite labeling during feeding on glucose alone, thus  
301 indicating the lack of galactose catabolism in the presence of glucose (Fig. 5A). During  
302 simultaneous feeding on <sup>13</sup>C-labeled glucose and a pentose substrate (xylose or arabinose), the  
303 labeling patterns of metabolites in the PP pathway (Xu5P, R5P, S7P) also indicated the lack of  
304 pentose assimilation (Fig. 5B). Furthermore, there was no indication of xylose incorporation  
305 into  $\alpha$ -ketoglutarate, consistent with the lack of the Weimberg pathway (Fig. S6). Therefore,  
306 our data from <sup>13</sup>C enrichment studies ascertained the absence of carbon assimilation from  
307 galactose, xylose, or arabinose in the presence of glucose (Fig. 5).

308 *Glucose with Fructose.* Following simultaneous feeding on [U-<sup>13</sup>C<sub>6</sub>]-glucose and unlabeled  
309 fructose, a persistence of nonlabeled fractions in the intracellular metabolites was consistent  
310 with both uptake and assimilation of fructose in the presence of glucose (Fig. 6). However, the  
311 differential abundance of the nonlabeled fractions indicated a bottleneck in fructose

312 assimilation, which may explain the slower rate of fructose depletion than glucose depletion  
313 from the extracellular medium (Fig. 2B; Fig. 6). Consistent with fructose incorporation through  
314 F1P into FBP, the highest fraction of nonlabeled carbons was seen in FBP (59-62%); both F6P  
315 and DHAP had lower nonlabeled fractions (25-30% and 17%, respectively) (Fig. 6). The lower  
316 fraction of nonlabeled carbons in DHAP than in F6P implied that the fructose-derived carbons  
317 were preferentially routed through a backward flux through upper EMP pathway towards the  
318 ED pathway (Fig. 6). The labeling of G6P reflected the nonlabeled and partially  $^{13}\text{C}$ -labeled  
319 fractions from F6P, consistent with this backward flux (Fig. 6). Therefore, in lieu of the forward  
320 EMP pathway, our data stresses the importance of the ED pathway in the co-processing of  
321 fructose with glucose.

322 The labeling patterns of metabolites in the PP pathway also showed that the contribution  
323 of the fructose-derived carbons in this pathway was preferentially through the non-oxidative  
324 route (Fig. 6). A transketolase reaction in the non-oxidative PP pathway combines the first two  
325 carbons of F6P with GAP to produce Xu5P. Both Xu5P and R5P have significant fractions of  
326 triply  $^{13}\text{C}$ -labeled carbons (38-44%), in accordance with the combination of nonlabeled F6P with  
327 triply  $^{13}\text{C}$ -labeled GAP following growth on  $^{13}\text{C}$ -labeled glucose with unlabeled fructose (Fig. 6).  
328 Due to the low fraction of nonlabeled GAP (as determined from DHAP labeling), there was a  
329 lack of appreciable fraction of doubly  $^{13}\text{C}$ -labeled R5P and Xu5P, which was evident in cells  
330 grown on  $[\text{U-}^{13}\text{C}_6]$ -glucose with unlabeled glucose (Fig. 6).

331 *Glucose with mannose.* In contrast to the metabolite labeling during growth on  $[\text{U-}^{13}\text{C}_6]$ -  
332 glucose with unlabeled fructose, the metabolite labeling patterns following feeding on the  $[\text{U-}$   
333  $^{13}\text{C}_6]$ -glucose with unlabeled mannose showed delayed assimilation of mannose into  
334 intracellular metabolism during exponential cell growth (Fig. 6). This was evident by the  
335 substantial increase in the nonlabeled fraction of FBP at the two timepoints, from 12% at an

336 optical density at 600 nm ( $OD_{600}$ ) of ~0.5 to 52% at  $OD_{600}$  of ~1.0 (Fig. 6). This time-dependent  
337 labeling data agreed with the fact that extracellular mannose started to decrease significantly  
338 after 6 h of growth, following the depletion of glucose (Fig. 2B).

339 A higher nonlabeled fraction of FBP than of F6P implied that incorporation of mannose-  
340 derived carbons into FBP by way of fructose was preferred in *P. protegens* Pf-5 (Fig. 6). In  
341 agreement with this catabolic route for mannose, there was a larger pool of FBP than F6P when  
342 cells were grown on the glucose:mannose mixture relative to the glucose only condition (Fig.  
343 S7). This large FBP pool was also seen in the glucose:fructose condition relative to the glucose  
344 only condition (Fig. S7). During feeding on  $^{13}C$ -glucose with unlabeled mannose, the nonlabeled  
345 fraction of DHAP (18%) was lower than F6P (28%) and G6P (26%) (Fig. 6). Therefore, these  
346 labeling data collectively indicated the cycling of nonlabeled mannose carbons backward  
347 through the upper EMP pathway towards the ED pathway, similar to the intracellular  
348 metabolism of fructose (Fig. 6).

349

350 **Cellular Carbon Fluxes during Co-utilization of Glucose and Fructose.** Quantitative MFA was  
351 used to assess differences in the metabolic fluxes during growth on glucose alone versus  
352 growth on glucose with fructose (Fig. 7; Table S4; Table S5). Our MFA focused on the pathways  
353 surrounding the incorporation points of carbohydrates: initial glucose catabolism, the EMP  
354 pathway, PP pathway, and the ED pathway (Fig. 7). Each MFA made use of the labeling data  
355 collected at  $OD_{600}$  of 0.5 during early exponential phase before extracellular glucose is depleted  
356 and was constrained by the consumption rate of each carbohydrate, biomass effluxes, and  
357 metabolite secretions (Fig. 7; Fig. S2; Table S5; Table S6). Upon optimization of the estimated  
358 metabolic fluxes, the model-estimated  $^{13}C$ -labeling patterns agreed well with the  
359 experimentally determined  $^{13}C$ -labeling patterns for each condition (Fig. S8; Fig. S9).

360 Despite the genome-encoded capabilities in *P. protegens* Pf-5 to involve the splitting of FBP  
361 to DHAP and GAP (Paulsen et al., 2005), the MFA revealed that the net flux was instead the  
362 aldolase reaction that combines DHAP and GAP to generate FBP (Fig. 7). Due to the additional  
363 incorporation of fructose-derived carbons through the flux from FBP to 6P-gluconate, there  
364 were higher fluxes from FBP to F6P (3-fold increase), F6P to G6P (3.6-fold increase), and G6P to  
365 6P-gluconate (2.3-fold increase) in cells grown on the glucose:fructose mixture compared to  
366 glucose alone (Fig. 7). Similar to metabolism of glucose alone, there was a significant flux of the  
367 glucose uptake channeled through glucose oxidation to gluconate (88%) followed by the ED  
368 pathway (95%) during the metabolism of both glucose and fructose (Fig. 7). Consistent with the  
369 increased carbon flux towards 6P-gluconate, there were a 4.3-fold increase in the flux toward  
370 the oxidative PP pathway (i.e. from 6P-gluconate to Ru5P) and a 19% increase in the ED  
371 pathway (i.e., from 6-gluconate to GAP and pyruvate) (Fig. 7).

372

373 **Kinetic Isotope Analysis during Co-utilization of Glucose and Mannose.** Due to the lack of  
374 isotopic pseudo-steady state during simultaneous growth on glucose and mannose, <sup>13</sup>C-MFA  
375 could not be conducted. To capture the assimilation route for mannose, we obtained  
376 measurements of metabolic isotopic fractions during six timepoints during exponential growth  
377 of <sup>13</sup>C-labeled glucose and unlabeled mannose (Fig. 8). Specifically, we examined the labeling  
378 patterns of gluconate, 6P-gluconate, G6P, F6P, FBP, and DHAP (Fig. 8). Across all timepoints,  
379 gluconate labeling was consistently ~100% fully <sup>13</sup>C-labeled, indicating that gluconate was  
380 exclusively the oxidized product of the <sup>13</sup>C-labeled glucose (Fig 8). However, the labeling of the  
381 other five metabolites had nonlabeled fractions derived from the assimilation of unlabeled  
382 mannose (Fig. 8). The labeling of 6P-gluconate exhibited the slowest kinetic incorporation of  
383 nonlabeled fractions (Fig. 8). The appearance of nonlabeled pool of 6P-gluconate (starting at



384 ~4%) occurred at the fifth measurement timepoint at an OD<sub>600</sub> of 0.94 (Fig. 8). By contrast, FBP  
385 exhibited the fastest incorporation of nonlabeled fraction that occurred at an OD<sub>600</sub> of 0.2 (Fig.  
386 8). Compared to the labeling kinetics of FBP, there was a delay in the incorporation of  
387 nonlabeled carbons in F6P and G6P, which started to occur an OD<sub>600</sub> of 0.6, and DHAP, which  
388 steadily increased after an OD<sub>600</sub> of 0.8 (Fig. 8). Statistical analysis (Mixed Effect Model;  $F_{3,57} =$   
389 12.973;  $p < 0.0001$ ) confirmed that the significant effect of OD<sub>600</sub> on the incorporation of  
390 mannose-derived nonlabeled carbons was dependent on the metabolite (Fig. 8). These kinetics  
391 data collectively demonstrated that, instead of being channeled directly from FBP to GAP and  
392 DHAP, mannose carbons were incorporated at FBP and cycled up through F6P and G6P to the  
393 ED pathway to generate subsequently GAP and DHAP (Fig. 8). Thus, the catabolic route for  
394 mannose was similar to what was determined for fructose catabolism.

395

## 396 **DISCUSSION**

397 The metabolic networks and fluxes of several *Pseudomonas* species, including *P. putida*, *P.*  
398 *fluorescens*, and *P. aeruginosa*, have been previously described (8–11, 22, 25). Here we present  
399 the first metabolic flux analysis of the recently characterized *P. protegens* Pf-5, a common plant  
400 commensal bacterium known to secrete specialized metabolites important for the biocontrol of  
401 fungi and bacteria pathogenic to plants (4, 6). Metabolic flux quantitation determined that  
402 initial glucose catabolism in *P. protegens* Pf-5 was primarily through periplasmic oxidation to  
403 gluconate with relatively minor influx of glucose through G6P (Fig. 4A). Up to 95% of consumed  
404 glucose in *P. protegens* Pf-5 was channeled through the ED pathway, which was also reported in  
405 *P. putida*, *P. fluorescens*, and *P. aeruginosa* (8, 11, 22, 25). Furthermore, the non-oxidative  
406 route was more significant than the oxidative route in generating PP pathway intermediates in  
407 *P. protegens* Pf-5, as previously reported for *P. putida* KT2440 (11) (Fig. 3B; Fig. 4A). The highly

408 active flux of pyruvate formation from malate in the *P. protegens* Pf-5 cells was also reported in  
409 *P. putida* and *P. fluorescens* (8, 10, 22). In sum, our results stressed that the metabolic network  
410 for glucose metabolism in *P. protegens* Pf-5 is consistent with the metabolic network of  
411 previously studied species of the *Pseudomonas* genus. Finally, through the contribution of  
412 different metabolic pathways, the total energetic yields of *P. protegens* Pf-5 were remarkably  
413 similar to *P. putida* KT2440, whose metabolism was been featured for its capability for fulfilling  
414 high demands of reducing power (10).

415 Root exudates and the breakdown of polysaccharides from plant biomass both provide  
416 various carbohydrates that stimulate growth of soil microorganisms, including *Pseudomonas*  
417 species (26). With respect to the catabolism of other carbohydrates besides glucose, we found  
418 that *P. protegens* Pf-5 did not metabolize the common hemicellulose monomers galactose,  
419 xylose, or arabinose in the presence of glucose but did utilize the carbon mixtures of glucose  
420 with fructose or mannose (Fig. 5; Fig. 6). In accordance with gene annotations, metabolite  
421 labeling data confirmed that fructose was incorporated into metabolism via FBP (Fig. 6).  
422 However, contrary to the possible route for mannose assimilation through F6P annotated in the  
423 *P. protegens* Pf-5 genome (7), the primary route of mannose assimilation in *P. protegens* Pf-5  
424 was found to be also via FBP (Fig. 6). In addition, the appearance of fructose extracellularly  
425 during growth on mannose implied conversion of mannose to fructose prior to intracellular  
426 metabolism (Fig. 2B). Mannose conversion to fructose by a mannose isomerase has been  
427 reported previously in *P. cepacia*, *P. aeruginosa*, and *P. saccharophila* (17–20). Whether a non-  
428 specific isomerase exists in *P. protegens* remains to be determined.

429 The cyclic metabolism linking backward flux from FBP through the upper EMP towards the  
430 ED pathway produces equivalent NADPH, but less net ATP, compared to direct FBP conversion  
431 to GAP and DHAP. Interestingly, instead of this direct contribution to the lower EMP pathway,

432 carbons from assimilated fructose and mannose were routed through the cyclic connection  
433 between upper EMP pathway and the ED pathway during mixed-substrate utilization (Fig. 7;  
434 Fig. 8). Comparable MFA findings were reported for fructose-only catabolism in *P. putida*  
435 KT2440 and *P. fluorescens* SBW25 (14, 16). Therefore, *P. protegens* Pf-5 exhibits a strong  
436 reliance on the ED pathway for both fructose and mannose assimilation even in the presence of  
437 glucose.

438 Similar growth phenotypes during co-utilization of hexoses implied that, despite different  
439 carbohydrates in the growth medium at the same total carbon equivalence, *P. protegens* Pf-5  
440 preserved a constant biomass maintenance (Fig. 2A). However, uptake of glucose was preferred  
441 over the uptake of fructose (3 to 1) or mannose (4 to 1) (Fig. 2; Table S2). The composition ratio  
442 of glucose to fructose in maize root exudates was found to be 2 to 1 (27). And, across soil  
443 horizons, the glucose:mannose ratio ranged approximately from 3:1 to 5:1 (28). Therefore,  
444 remarkably, the relative consumption rates of glucose versus fructose or mannose in *P.*  
445 *protegens* Pf-5 were in agreement with relative composition of these carbohydrates in  
446 environmentally-relevant conditions.

447 Related to the potential of *P. protegens* Pf-5 as a biocatalytic platform, the innate  
448 production and secretion of gluconate and 2-ketogluconate in *P. protegens* Pf-5 are additional  
449 attractive features. Oxidized sugars are important precursors to polymeric materials including  
450 polyesters. In fact, gluconate was identified as a top 30 value-added candidate for production of  
451 bio-inspired materials (29). Under our experimental conditions, the secretion rates of gluconate  
452 and 2-ketogluconate collectively accounted for about 35% of the glucose uptake in *P. protegens*  
453 during exponential growth whereas metabolite secretion of gluconate was reported to be less  
454 10% of the glucose uptake in *P. putida* KT2440 (11) (Fig. 2C). While there were relatively similar  
455 secretions during growth on glucose alone or glucose and fructose, growth on glucose and

456 mannose resulted in a decrease in the total secretion (by about 3.5 mM) of gluconate and 2-  
457 ketogluconate (Fig. 2C). After glucose was depleted, a decrease in the concentration of both  
458 gluconate and 2-ketogluconate indicated that the cells can utilize these metabolites once their  
459 favored carbon source is exhausted (Fig. 2B; Fig. 2C). This phenomenon would need to be  
460 considered and manipulated to harvest these metabolite secretions in *P. protegens* Pf-5 as  
461 valuable products. In light of the abundance of different types of carbohydrates in renewable  
462 carbon feedstocks in natural environments and in use for engineered bioproduction (30), our  
463 findings collectively provide important insights regarding the cellular metabolism underlying  
464 carbohydrate co-utilization in *P. protegens* Pf-5 and related *Pseudomonas* species.

465

## 466 **MATERIALS AND METHODS**

467 **Materials.** The *P. protegens* Pf-5 cells were acquired from the American Type Culture Collection  
468 (Manassas, VA). Unless noted otherwise, chemicals used in the growth media were obtained  
469 from Sigma-Aldrich (St. Louis, MO), Cayman Chemical (Ann Arbor, MI), or Fisher Scientific  
470 (Pittsburgh, PA). The <sup>13</sup>C-labeled glucose ([U-<sup>13</sup>C<sub>6</sub>]-glucose and [1,2-<sup>13</sup>C<sub>6</sub>]-glucose) were  
471 purchased from Cambridge Isotopes (Tewksbury, MA) and Omicron Biochemicals (South Bend,  
472 IN), respectively. All culture solutions were prepared with Millipore water (18.2 MΩ cm,  
473 Millipore; Billerica, MA, USA) while resuspensions for LC-HRMS analysis were made with LC-MS  
474 grade water. Solutions were sterilized by passing through a 0.22-μm nylon filters (Waters  
475 Corporation, MA). An Agilent Cary UV-visible spectrophotometer (Santa Clara, CA) was used for  
476 optical density readings at 600 nm. The LC-HRMS analysis was conducted on an ultra-high-  
477 performance LC (Thermo scientific DionexUltiMate 3000) coupled to a high-  
478 resolution/accurate-mass MS (Thermo Scientific Q Exactive quadrupole-Orbitrap hybrid MS)  
479 with electrospray ionization.

480

481 **Culturing conditions and growth measurements.** Batch growth experiments (three to seven  
482 biological replicates) of *P. protegens* Pf-5 were conducted in an incubator (model I24; New  
483 Brunswick Scientific, Edison, NJ) maintained at 30°C and shaken at 220 rpm. Initial growth in  
484 nutrient-rich medium prior to growth in minimal-nutrient medium was conducted as previously  
485 described (11). Final growth experiments were conducted in 125-mL baffled flasks with a pH-  
486 adjusted (7.0) and filter-sterilized minimal-nutrient medium that contained major salts and  
487 essential trace metal nutrients as previously reported (31): 89.4 mM K<sub>2</sub>HPO<sub>4</sub>, 56.4 mM  
488 NaH<sub>2</sub>PO<sub>4</sub>, 0.81 mM MgSO<sub>4</sub> · 7H<sub>2</sub>O, 18.7 mM NH<sub>4</sub>Cl, 8.6 mM NaCl, 34 μM CaCl<sub>2</sub> · 2 H<sub>2</sub>O, 30 μM  
489 FeSO<sub>4</sub> · 7 H<sub>2</sub>O, 0.86 μM CuSO<sub>4</sub> · 5 H<sub>2</sub>O, 1.9 μM H<sub>3</sub>BO<sub>3</sub>, 7.7 μM ZnSO<sub>4</sub> · 7 H<sub>2</sub>O, 0.75 μM MnSO<sub>4</sub>  
490 · 5 H<sub>2</sub>O, 0.26 μM NiCl<sub>2</sub> · 6 H<sub>2</sub>O, and 0.3 μM Na<sub>2</sub>MoO<sub>4</sub> · 5 H<sub>2</sub>O. The carbohydrate composition  
491 was 100 mM C total for glucose alone (equivalent to 16.7 mM or 3 g L<sup>-1</sup> glucose) and for 1:1  
492 glucose:xylose, glucose:arabinose, glucose:galactose, glucose:mannose, or glucose:fructose. For  
493 cellular isotopic enrichment, either [U- <sup>13</sup>C<sub>6</sub>]-glucose or [1,2- <sup>13</sup>C<sub>6</sub>]-glucose was used in glucose-  
494 only growth, but only [U- <sup>13</sup>C<sub>6</sub>]-glucose was used for mixtures in combination with an unlabeled  
495 second carbohydrate. Bacterial growth in the biological replicates was monitored as a function  
496 of time until late stationary phase using OD<sub>600</sub> measurements (Fig. S1)—cell suspensions were  
497 diluted when the OD<sub>600</sub> value was above 0.5 to get accurate reading. Cell dry weight in grams  
498 (*g*<sub>CDW</sub>) was also determined throughout growth by lyophilizing the cell pellets as previously  
499 described (11).

500

501 **Measurement of Carbohydrate Consumption.** Independent <sup>13</sup>C-tracer experiments, as  
502 described in the next section, confirmed that extracellular depletion of the substrates  
503 correlated with substrate consumption. The extracellular depletion of each carbohydrate

504 substrate (three biological replicates) was determined throughout 24 h of cell growth. Culture  
505 aliquots were pelleted by centrifugation and the supernatant was stored at -20 °C until further  
506 analysis. Following previously reported LC methods for carbohydrate analysis (21), we applied  
507 an analytical method using LC-HRMS for monitoring carbohydrate concentration in the  
508 extracellular solution. Peak identification and quantification of carbohydrate concentrations  
509 were conducted with ThermoScientific Xcalibur™ 3.0 Quan Browser.

510

511 **Metabolite Monitoring and Quantification.** *Extracellular Metabolites.* To determine metabolite  
512 excretion rates, cell suspension samples (three biological replicates) were harvested  
513 periodically throughout growth and pelleted with centrifugation before the supernatant was  
514 removed and stored at -20 °C until LC-HRMS analysis. Dilutions of 1:10, 1:100, and 1:1000 were  
515 conducted to account for the varying concentrations of each metabolite over time. For the LC,  
516 an Acquity UPLC Waters 1.7 µm particle size column with dimensions of 2.1 x 100 mm was used  
517 for all metabolomics samples (Milford, MA) with constant column temperature of 25°C. The  
518 flow rate was kept constant at 0.180-mL min<sup>-1</sup>. The mobile phase composition and LC protocol  
519 were as previously described (31). The injection volume for each sample was 10-µL. The MS was  
520 operated in full scan negative mode. Metabolite identification was based on accurate mass and  
521 matches with standard retention time. Metabolite levels were quantified using  
522 ThermoScientific Xcalibur™ 3.0 Quan Browser.

523 *Intracellular Metabolites.* Cells were separated by filtration and then lysed to extract  
524 intracellular metabolites as described in Sasnow et al. (11). Metabolites in solution were  
525 monitored by LC-HRMS and the <sup>13</sup>C labeling patterns were analyzed on the Metabolomic  
526 Analysis and Visualization Engine (MAVEN) software (32, 33). Isotopologue data were obtained  
527 for the following compounds: 6P-gluconate, G6P, F6P, FBP, DHAP, 3-phosphoglycerate, PEP,

528 pyruvate, Xu5P, R5P, S7P, aspartate, citrate,  $\alpha$ -ketoglutarate, succinate, and malate. Aspartate  
529  $^{13}\text{C}$ -labeling is used as a proxy for OAA  $^{13}\text{C}$ -labeling by assuming equilibrium between the two  
530 compounds (11). The labeling of dissolved  $\text{CO}_2$  was estimated from the labeling patterns of  
531 ornithine and citrulline (Fig. S2); ornithine incorporates one mole of dissolved  $\text{CO}_2$  to become  
532 citrulline. All the extracted isotopologues were corrected for natural abundance of  $^{13}\text{C}$ . To verify  
533 pseudo-steady state isotopic enrichment of the intracellular pools, metabolites were isolated  
534 from cellular extracts obtained at two different timepoints during the exponential phase, at  
535  $\text{OD}_{600}$  values of  $\sim 0.5$  and  $\sim 1.0$  (11). To analyze mannose incorporation over time, cells were  
536 extracted at six timepoints during exponential growth corresponding to  $\text{OD}_{600}$  values of  $\sim 0.2$ ,  
537  $\sim 0.4$ ,  $\sim 0.6$ ,  $\sim 0.8$ ,  $\sim 0.9$ , and  $\sim 1.3$ . A mixed effect model was conducted using R (34) and the  
538 lmerTest package (35), which modeled the nonlabeled fraction (log transformed) by  $\text{OD}_{600}$ ,  
539 metabolite, and their interaction with the random effect of biological replicate.

540

541 **Quantitative Metabolic Flux Modeling.** Quantitation of the metabolic fluxes was achieved for  
542 cells grown on glucose alone and glucose with fructose. We employed the following  
543 experimental data to constrain the metabolic flux analysis: substrate uptake rate, metabolite  
544 excretions, growth rate, and cellular stoichiometry. Carbon effluxes from intermediates in  
545 central metabolism towards biomass production were determined based on the growth rate for  
546 each condition and the biomass composition of *P. putida* (nucleic acids, proteins, cell  
547 membrane, and carbohydrate polymers) (36). An initial reaction network for the central carbon  
548 metabolism of *P. protegens* PF-5 was constructed using predicted genome-scale metabolic  
549 model (7), and gene annotation of metabolic enzymes reported on the KEGG database (37–39),  
550 and MetaCyc (40). The metabolic reaction network was validated through  $^{13}\text{C}$ -labeling of  
551 intracellular metabolites. The following reactions were constrained in the forward direction:

552 gluconate → 6P-gluconate, 6P-gluconate → ribulose 5-phosphate, gluconate → 2-  
553 ketogluconate, 2-ketogluconate → 6P-gluconate, glucose → G6P, FBP → F6P, malate →  
554 pyruvate, pyruvate → OAA, and PEP → OAA. Optimized fluxes in the model metabolic network  
555 reactions were determined by the 13CFLUX2 software package (<http://www.13cflux.net>) (41)  
556 whereby quality of fit was optimized iteratively by comparing experimental <sup>13</sup>C-labeling data  
557 and the *in silico*-estimated labeling data.

558

## 559 SUPPLEMENTAL MATERIAL

560 Supplemental material can be found in the online version of this article.

561

## 562 ACKNOWLEDGEMENTS

563 Graduate financial support for R.A.W and C.M.M. was provided in part by the College of  
564 Agriculture and Life Sciences at Cornell University. We are grateful to Dr. Krista A. Barzen-  
565 Hanson from the Aristilde Research Group at Cornell University (presently at Elmira College) for  
566 her technical assistance in implementing the LC-MS protocol to analyze the carbohydrate  
567 compounds in solution. We acknowledge Erika Mudrak at the Cornell Statistical Consulting Unit  
568 for her assistance with implementing and interpreting the statistical analysis.

569

## 570 REFERENCES

- 571 1. Singh PB, Saini HS, Kahlon RS. 2016. *Pseudomonas*: The Versatile and Adaptive Metabolic  
572 Network, p. 81–126. *In Pseudomonas: Molecular and Applied Biology*. Springer  
573 International Publishing, Cham.
- 574 2. Hung C-S, Zingarelli S, Nadeau LJ, Biffinger JC, Drake CA, Crouch AL, Barlow DE, Russell JN,  
575 Crookes-Goodson WJ. 2016. Carbon catabolite repression and Impranil polyurethane



- 576 degradation in *Pseudomonas protegens* strain Pf-5. Appl Environ Microbiol 82:6080–  
577 6090.
- 578 3. Loper JE, Gross H. 2007. Genomic analysis of antifungal metabolite production by  
579 *Pseudomonas fluorescens* Pf-5. Eur J Plant Pathol 119:265–278.
- 580 4. Loper JE, Kobayashi DY, Paulsen IT. 2007. The genomic sequence of *Pseudomonas*  
581 *fluorescens* Pf-5: insights into biological control 97.
- 582 5. Nowak-Thompson B, Gould J, Kraus J, Loper E. 1994. Production of 2,4-  
583 diacetylphloroglucinol by the biocontrol agent *Pseudomonas fluorescens* Pf-5. Can J  
584 Microbiol 40:1064–1066.
- 585 6. Ramette A, Frapolli M, Saux MF, Gruffaz C, Meyer J, Défago G, Sutra L, Moënne-loccoz Y.  
586 2011. *Pseudomonas protegens* sp. nov., widespread plant-protecting bacteria producing  
587 the biocontrol compounds 2,4-diacetylphloroglucinol and pyoluteorin. Syst Appl  
588 Microbiol 34:180–188.
- 589 7. Paulsen IT, Press CM, Ravel J, Kobayashi DY, Myers GSA, Mavrodi D V, DeBoy RT, Seshadri  
590 R, Ren Q, Madupu R, Dodson RJ, Durkin AS, Brinkac LM, Daugherty SC, Sullivan SA,  
591 Rosovitz MJ, Gwinn ML, Zhou L, Schneider DJ, Cartinhour SW, Nelson WC, Weidman J,  
592 Watkins K, Tran K, Khouri H, Pierson EA, Pierson LS, Thomashow LS, Loper JE. 2005.  
593 Complete genome sequence of the plant commensal *Pseudomonas fluorescens* Pf-5. Nat  
594 Biotechnol 23:873–878.
- 595 8. Del Castillo T, Ramos JL, Rodríguez-Herva JJ, Fuhrer T, Sauer U, Duque E. 2007.  
596 Convergent peripheral pathways catalyze initial glucose catabolism in *Pseudomonas*  
597 *putida*: Genomic and flux analysis. J Bacteriol 189:5142–5152.

- 598 9. Chavarría M, Kleijn RJ, Sauer U, Pflüger-grau K, Lorenzo V De. 2012. Regulatory tasks of  
599 the phosphoenolpyruvate-phosphotransferase system of *Pseudomonas putida* in central  
600 carbon metabolism. *MBio* 3:1–9.
- 601 10. Nickel PI, Chavarría M, Fuhrer T, Sauer U, Lorenzo V De. 2015. *Pseudomonas putida*  
602 KT2440 metabolizes glucose through a cycle formed by enzymes of the Entner-  
603 Doudoroff, Embden-Meyerhof-Parnas, and Pentose Phosphate pathways 1–29.
- 604 11. Sasnow SS, Wei H, Aristilde L. 2016. Bypasses in intracellular glucose metabolism in iron-  
605 limited *Pseudomonas putida*. *Microbiologyopen* 5:3–20.
- 606 12. Van Dijken JP, Quayle JR. 1977. Fructose metabolism in four *Pseudomonas* species. *Arch*  
607 *Microbiol* 114:281–6.
- 608 13. Rojo F. 2010. Carbon catabolite repression in *Pseudomonas* : optimizing metabolic  
609 versatility and interactions with the environment. *FEMS Microbiol Rev* 34:658–684.
- 610 14. Lien SK, Niedenführ S, Sletta H, Nöh K, Bruheim P. 2015. Fluxome study of *Pseudomonas*  
611 *fluorescens* reveals major reorganisation of carbon flux through central metabolic  
612 pathways in response to inactivation of the anti-sigma factor MucA. *BMC Syst Biol* 9:6.
- 613 15. Sawyer MH, Baumann P, Baumann L, Berman SM, Canovas JL, Berman RH. 1977.  
614 Pathways of d-fructose catabolism in species of *Pseudomonas*. *Arch Microbiol* 112:49–  
615 55.
- 616 16. Sudarsan S, Dethlefsen S, Blank LM, Siemann-Herzberg M, Schmid A. 2014. The  
617 functional structure of central carbon metabolism in *Pseudomonas putida* KT2440. *Appl*  
618 *Environ Microbiol* 80:5292–303.
- 619 17. Eagon RG, Williams AK. 1960. Enzymatic patterns of adaptation to fructose, glucose, and

- 620           mannose exhibited by *Pseudomonas aeruginosa*. J Bacteriol 79:90–94.
- 621   18.   Hu X, Shi Y, Zhang P, Miao M, Zhang T, Jiang B. 2016. d -Mannose: Properties, production,  
622           and applications: An overview. Compr Rev Food Sci Food Saf 15:773–785.
- 623   19.   Allenza P, Morrell MJ, Detroy RW. 1990. Conversion of mannose to fructose by  
624           immobilized mannose isomerase from *Pseudomonas cepacia*. Appl Biochem Biotechnol  
625           24:171–182.
- 626   20.   Palleroni NJ, Doudoroff M. 1956. Mannose isomerase of *Pseudomonas saccharophila*. J  
627           Biol Chem 218:535–548.
- 628   21.   Barzen-Hanson KA, Wilkes RA, Aristilde L. 2018. Quantitation of environmentally relevant  
629           carbohydrate monomers and dimers by liquid chromatography coupled with high-  
630           resolution mass spectrometry. Carbohydr Res.
- 631   22.   Fuhrer T, Fischer E, Sauer U. 2005. Experimental identification and quantification of  
632           glucose metabolism in seven bacterial species. J Bacteriol 187:1581–90.
- 633   23.   Asai T, Aida K, Sugisaki Z, Yakeishi N. 1955. On a-ketoglutaratic acid fermentation. J Gen  
634           Appl Microbiol 1:308–346.
- 635   24.   Aristilde L. 2017. Metabolite labelling reveals hierarchies in *Clostridium acetobutylicum*  
636           that selectively channel carbons from sugar mixtures towards biofuel precursors. Microb  
637           Biotechnol 10:162–174.
- 638   25.   Berger A, Dohnt K, Tielen P, Jahn D, Becker J, Wittmann C. 2014. Robustness and  
639           plasticity of metabolic pathway flux among uropathogenic isolates of *Pseudomonas*  
640           *aeruginosa*. PLoS One 9:e88368.
- 641   26.   Gunina A, Kuzyakov Y. 2015. Soil biology & biochemistry sugars in soil and sweets for

- 642 microorganisms : Review of origin, content, composition and fate. *Soil Biol Biochem*  
643 90:87–100.
- 644 27. Hütsch BW, Augustin J, Merbach W. 2002. Plant rhizodeposition — an important source  
645 for carbon turnover in soils. *J Plant Nutr Soil Sci* 165:397.
- 646 28. Benzing-Purdie L. 1980. Organic matter and carbohydrate distribution in an orthic humic  
647 gleysol. *Soil Biol Biochem* 12:567–571.
- 648 29. Werpy T, Petersen G, Aden A, Bozell J, Holladay J, White J, Manheim A, Eliot D, Lasure L,  
649 Jones S. 2004. Top value-added chemicals from biomass. volume 1-Results of screening  
650 for potential candidates from sugars and synthesis gas. Washington DC.
- 651 30. Poblete-Castro I, Becker J, Dohnt K, dos Santos VM, Wittmann C. 2012. Industrial  
652 biotechnology of *Pseudomonas putida* and related species. *Appl Microbiol Biotechnol*  
653 93:2279–2290.
- 654 31. Aristilde L, Reed ML, Wilkes RA, Youngster T, Kukurugya MA, Katz V, Sasaki CRS. 2017.  
655 Glyphosate-induced specific and widespread perturbations in the metabolome of soil  
656 *Pseudomonas* species. *Front Environ Sci* 5:34.
- 657 32. Clasquin MF, Melamud E, Rabinowitz JD. 2012. LC-MS data processing with MAVEN: A  
658 metabolomic analysis and visualization engine, p. Unit14.11. *In* Current Protocols in  
659 Bioinformatics. John Wiley & Sons, Inc., Hoboken, NJ, USA.
- 660 33. Melamud E, Vastag L, Rabinowitz JD. 2010. Metabolomic analysis and visualization  
661 engine for LC–MS data. *Anal Chem* 82:9818–9826.
- 662 34. R Core Team. 2016. R: A language and environment for statistical computing. R  
663 Foundation for Statistical Computing, Vienna, Austria.

- 664 35. Kuznetsova A, Brockhoff P, Christensen R. 2017. lmerTest package: Tests in linear mixed  
665 effects models. *J Stat Softw* 82:1–26.
- 666 36. van Duuren JB, Puchałka J, Mars AE, Bücken R, Eggink G, Wittmann C, dos Santos VA.  
667 2013. Reconciling in vivo and in silico key biological parameters of *Pseudomonas putida*  
668 KT2440 during growth on glucose under carbon-limited condition. *BMC Biotechnol* 13:93.
- 669 37. Kanehisa M, Sato Y, Kawashima M, Furumichi M, Tanabe M. 2016. KEGG as a reference  
670 resource for gene and protein annotation. *Nucleic Acids Res* 44:D457–D462.
- 671 38. Kanehisa M, Goto S. 2000. KEGG: kyoto encyclopedia of genes and genomes. *Nucleic*  
672 *Acids Res* 28:27–30.
- 673 39. Kanehisa M, Furumichi M, Tanabe M, Sato Y, Morishima K. 2017. KEGG: new perspectives  
674 on genomes, pathways, diseases and drugs. *Nucleic Acids Res* 45:D353–D361.
- 675 40. Caspi R, Altman T, Dreher K, Fulcher CA, Subhraveti P, Keseler IM, Kothari A,  
676 Krummenacker M, Latendresse M, Mueller LA, Ong Q, Paley S, Pujar A, Shearer AG,  
677 Travers M, Weerasinghe D, Zhang P, Karp PD. 2012. The MetaCyc database of metabolic  
678 pathways and enzymes and the BioCyc collection of pathway/genome databases. *Nucleic*  
679 *Acids Res* 40:D742–D753.
- 680 41. Weitzel M, Nöh K, Dalman T, Niedenführ S, Stute B, Wiechert W. 2013. 13CFLUX2--high-  
681 performance software suite for (13)C-metabolic flux analysis. *Bioinformatics* 29:143–5.
- 682

683 FIGURES

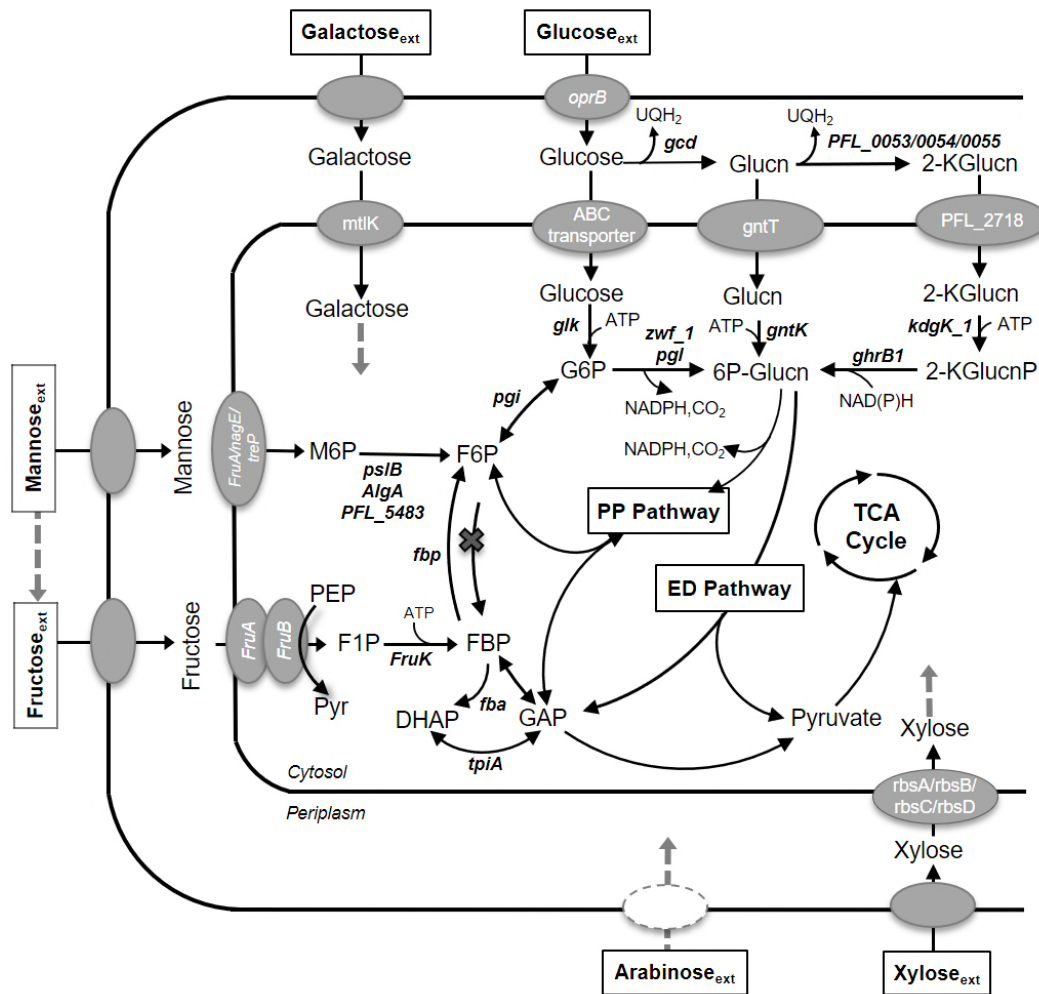

684

685 **FIG 1.** Putative genes involved in the uptake and initial catabolism of glucose, galactose,  
 686 mannose, fructose, xylose, and arabinose into central metabolism. The gene annotations for  
 687 pathways were collected from KEGG database (37–39) and MetaCyc database (40) for *P.*  
 688 *protegens* Pf-5. The corresponding gene loci for the genes in the figure are shown in Table S1.  
 689 The abbreviations are as follows: gluconate, Glucon; 2-ketogluconate, 2-KGlucon; 2-keto-6-  
 690 phosphogluconate, 2-KGluconP; glucose 6-phosphate, G6P; 6-phosphogluconate, 6P-Glucon;  
 691 fructose 6-phosphate, F6P; fructose 1,6-bisphosphate, FBP; dihydroxyacetone-3-phosphate,  
 692 DHAP; glyceraldehyde 3-phosphate, GAP; fructose 1-phosphate, F1P; pyruvate, Pyr;  
 693 phosphoenolpyruvate, PEP.

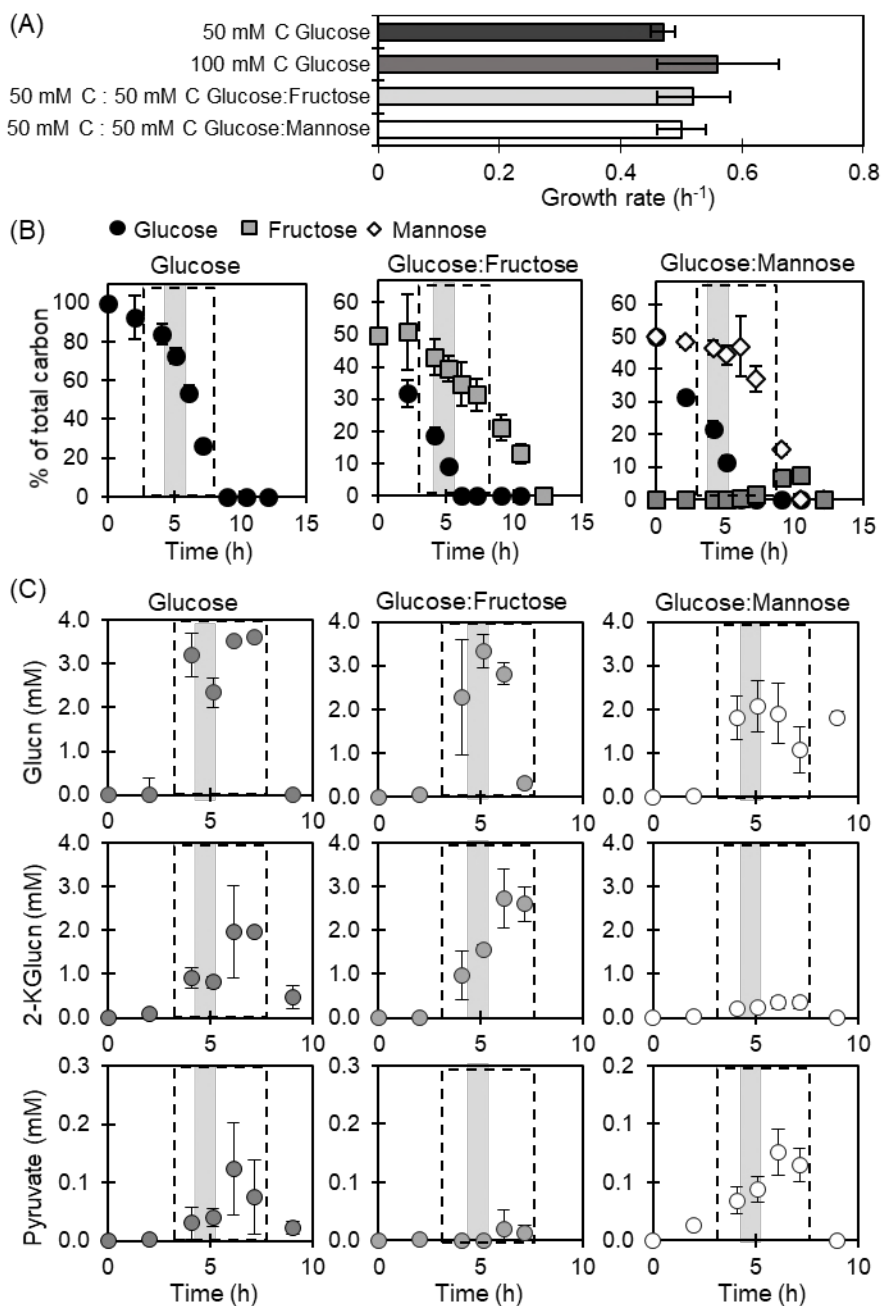

694 **FIG 2.** (A) Growth rate, (B) kinetic profile of carbohydrate depletion, and (C) kinetic profile of  
 695 metabolite secretions for cells fed glucose only or equimolar glucose:fructose or  
 696 glucose:mannose. Initial total carbohydrate concentration was 100 mM C (3 g L<sup>-1</sup>). In B and C,  
 697 the data points within the dashed box were obtained during exponential growth; the shaded  
 698 area at an OD<sub>600</sub> of 0.5 corresponds to the timepoint for the measured labeling data used for  
 699 the MFA. Data are shown as means ± standard deviation from biological replicates (*n* = 3).

700

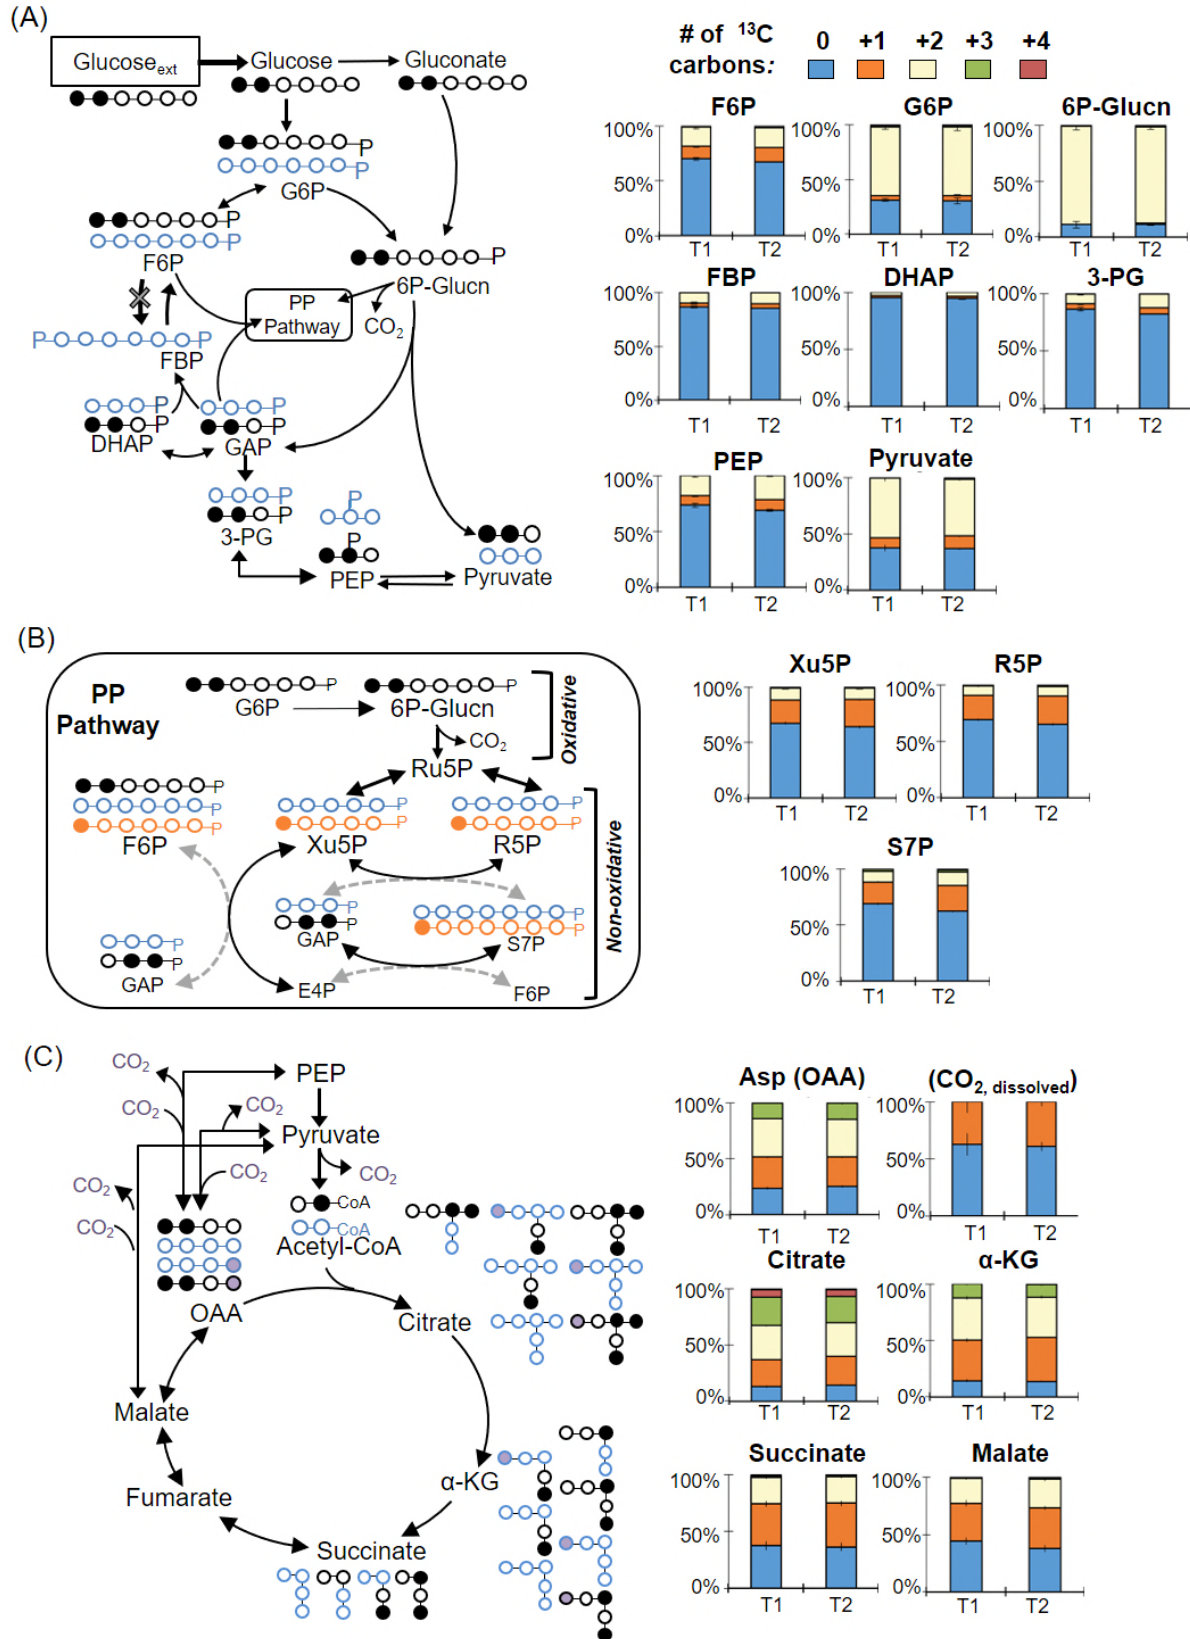



702 **FIG 3.** Long-term isotopic enrichment with [1,2-<sup>13</sup>C<sub>2</sub>]-glucose for carbon mapping of the  
703 metabolic network structure in *P. protegens* Pf-5. Carbon mapping is illustrated on the left and  
704 the metabolite labeling data are provided on the right for the following: (A) Initial glucose  
705 catabolism, Embden-Meyerhof-Parnas (EMP) pathway, and the Entner-Doudoroff (ED)  
706 pathway; (B) Oxidative and non-oxidative routes of the pentose-phosphate (PP) pathway; (C)  
707 the tricarboxylic acid (TCA) cycle. The dashed arrows describe minor formation routes of the  
708 metabolites. In the carbon mapping, blue represents the fate of structures derived from the ED  
709 and reverse-EMP pathways and orange represents the fate of structures derived from the  
710 oxidative PP pathway. Labeling patterns: nonlabeled (light blue), singly labeled (orange), doubly  
711 labeled, (cream), triply labeled (green), and quadruply labeled (red). Labeling data (average ±  
712 standard deviation) were from three independent biological replicates. The abbreviations are as  
713 follows: gluconate, Glucn; 2-ketogluconate, 2-KGlucn; glucose 6-phosphate, G6P; 6-  
714 phosphogluconate, 6P-Glucn; fructose 6-phosphate, F6P; fructose 1,6-bisphosphate, FBP;  
715 dihydroxyacetone-3-phosphate, DHAP; glyceraldehyde 3-phosphate, GAP;  
716 phosphoenolpyruvate, PEP; 3-phosphoglycerate, 3PG; xylulose 5-phosphate, Xu5P; ribose 5-  
717 phosphate, R5P; sedoheptulose 7-phosphate, S7P; oxaloacetate, OAA; aspartate, Asp; α-  
718 ketogluconate, α-KG.  
719

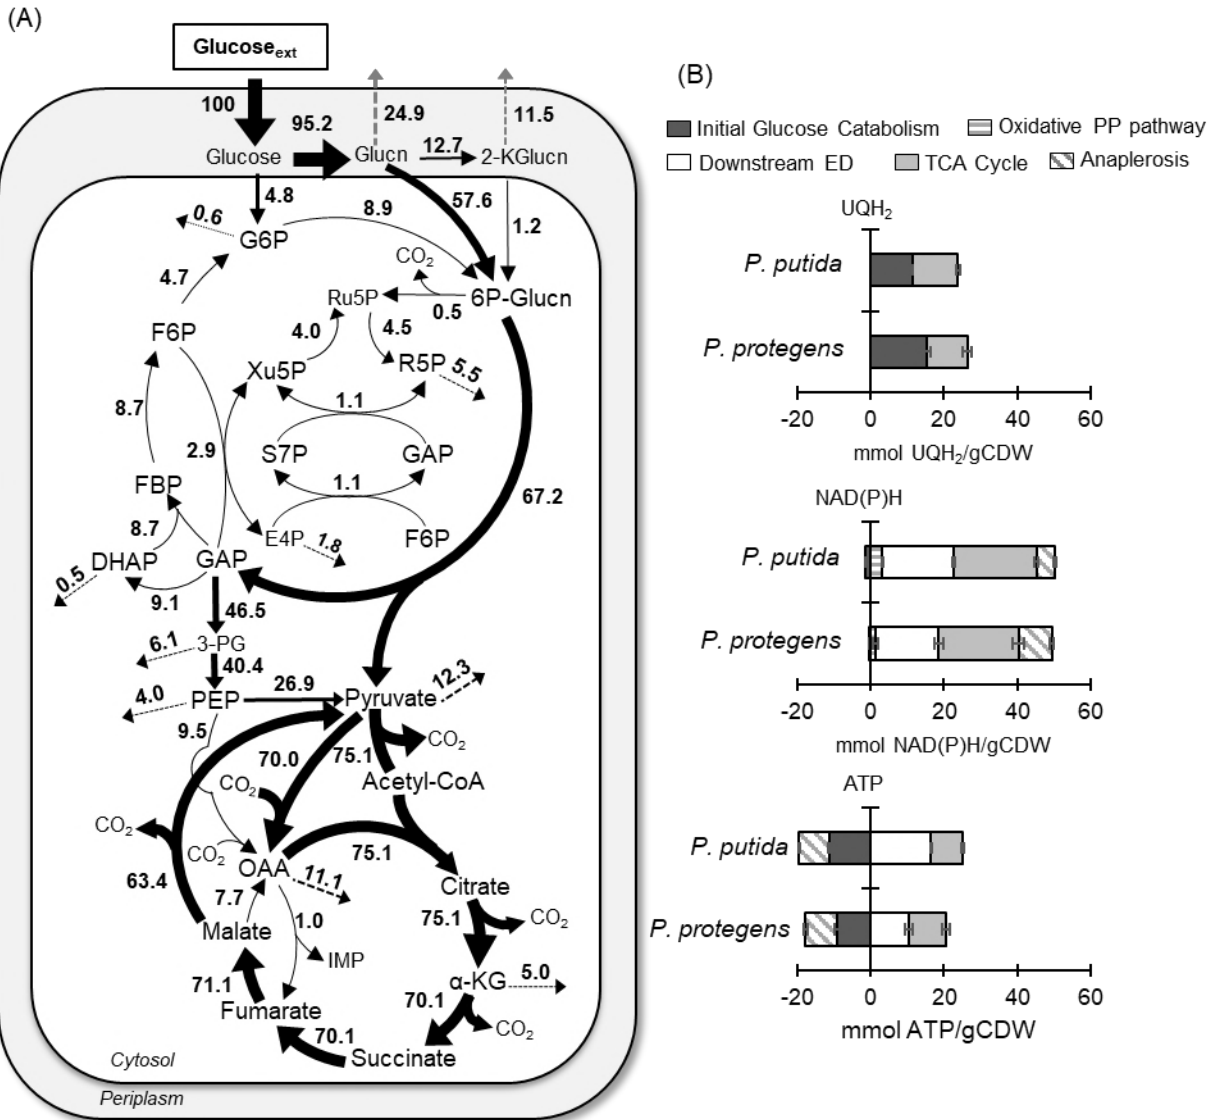

720

721 **FIG 4.** (A) Quantitative metabolic flux analysis and (B) energetic distributions in glucose-grown  
 722 *P. protegens* Pf-5. All fluxes are normalized to 100% glucose uptake and the thickness of each  
 723 arrow is scaled to the relative flux percentage. For A, black dotted arrows indicate contribution  
 724 to biomass and grey dashed arrows indicate excretion fluxes. The absolute fluxes (mean ±  
 725 standard deviation) are listed in Table S3 and S4. Abbreviations for A are as shown in the legend  
 726 of Fig. 3. For B, the relative contribution of different pathways to the NAD(P)H, UQH<sub>2</sub>, and ATP  
 727 pools were calculated from metabolic fluxes. Data for *P. putida* KT2440 were obtained from  
 728 MFA reported in Nikel et al. (10). All values in part B are relative to glucose consumption rate  
 729 and cellular biomass.

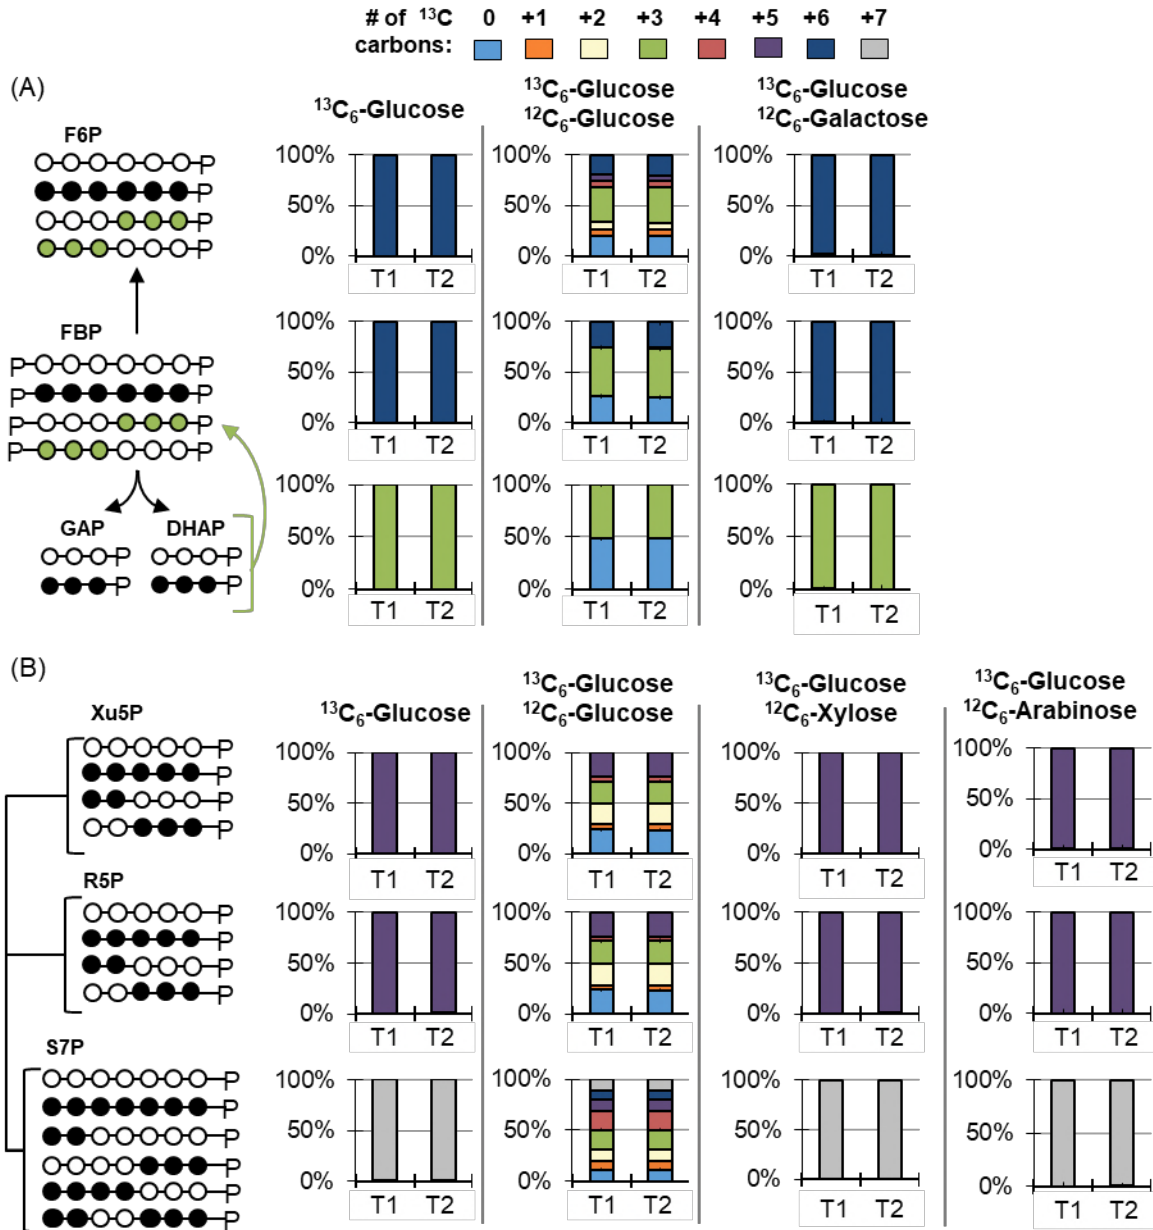

730

731 **FIG 5.** Metabolite labeling patterns during growth on [U-<sup>13</sup>C<sub>6</sub>]-glucose (<sup>13</sup>C<sub>6</sub>-Glucose) alone or

732 with unlabeled glucose (<sup>12</sup>C<sub>6</sub>-Glucose), unlabeled galactose (<sup>12</sup>C<sub>6</sub>-Galactose), unlabeled xylose

733 (<sup>12</sup>C<sub>6</sub>-Xylose), or unlabeled arabinose (<sup>12</sup>C<sub>6</sub>-Arabinose). (A) Carbon mapping (left) and the

734 labeling data (right) for intracellular metabolites in the reverse Emden-Meyerhof-Parnas

735 pathway following feeding on <sup>13</sup>C<sub>6</sub>-Gluc alone or with <sup>12</sup>C<sub>6</sub>-Gluc or <sup>12</sup>C<sub>6</sub>-Gala. (B) Carbon

736 mapping (left) and the labeling data (right) for intracellular metabolites in the pentose-

737 phosphate pathway following feeding on <sup>13</sup>C<sub>6</sub>-Gluc alone or with <sup>12</sup>C<sub>6</sub>-Gluc, <sup>12</sup>C<sub>6</sub>-Xylo, or <sup>12</sup>C<sub>6</sub>-

738 Arab. In the carbon mapping, the open circles and the filled circles represent unlabeled and

739 <sup>13</sup>C-carbons, respectively. Data were obtained at two timepoints during exponential growth: at  
740 OD<sub>600</sub> 0.5-0.6 (T1) and at OD<sub>600</sub> 0.9-1.0 (T2). Labeling color legend: nonlabeled carbon (light  
741 blue), one <sup>13</sup>C-carbon (orange), two <sup>13</sup>C-carbons (cream), three <sup>13</sup>C-carbons (green), four <sup>13</sup>C-  
742 carbons (red), five <sup>13</sup>C-carbons (purple), six <sup>13</sup>C-carbons (dark blue), and seven <sup>13</sup>C-carbons  
743 (grey). Labeling data (average ± standard deviation) were from three biological replicates. Very  
744 small error bars are not noticeable. The abbreviations used for the metabolites are given in Fig.  
745 1 and Fig. 3.  
746

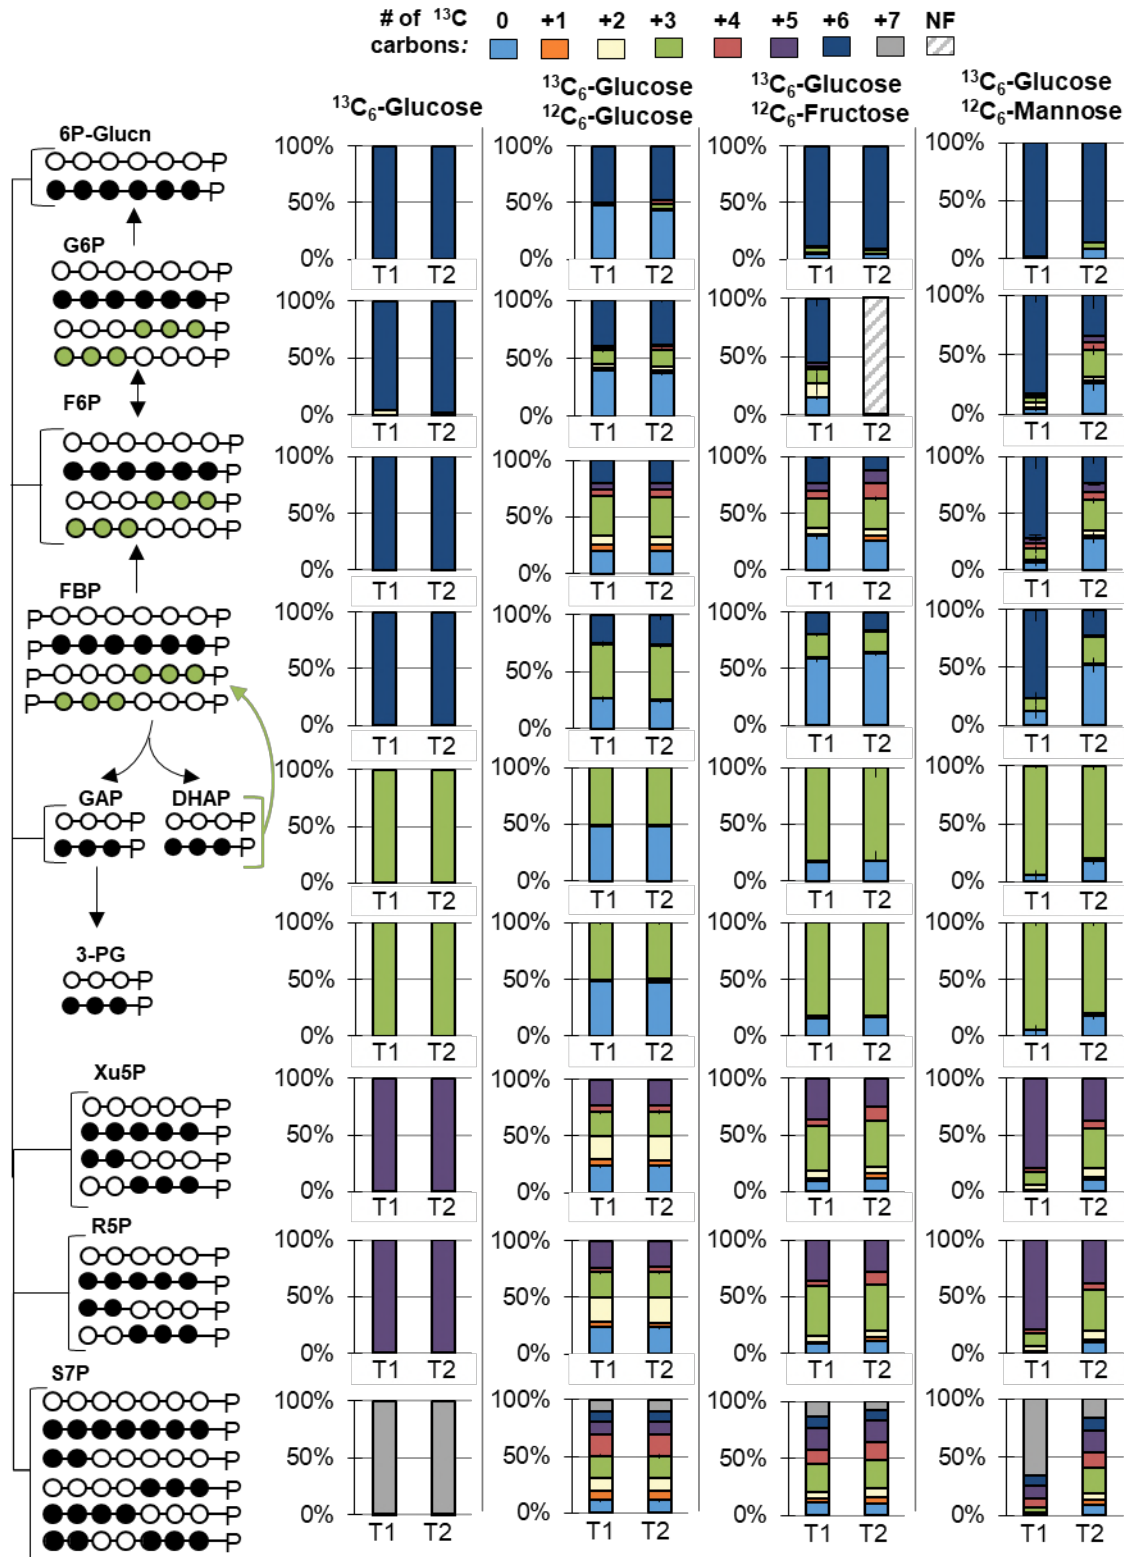

747

748

**FIG 6.** Metabolite labeling patterns during growth on [U-<sup>13</sup>C<sub>6</sub>]-glucose (<sup>13</sup>C<sub>6</sub>-Glucose) alone or

749

with unlabeled glucose (<sup>12</sup>C<sub>6</sub>-Glucose), unlabeled fructose (<sup>12</sup>C<sub>6</sub>-Fructose), or unlabeled

750 mannose ( $^{12}\text{C}_6$ -Mannose). Carbon mapping (left) and the labeling data (right) for intracellular  
751 metabolites in the Entner-Doudoroff pathway, reverse Emden-Meyerhof-Parnas (EMP)  
752 pathway, and the pentose-phosphate pathway. The open circles and the filled circles represent  
753 unlabeled and  $^{13}\text{C}$ -carbons, respectively; the-green colored circles represent labeling schemes  
754 specifically from reverse flux through upper EMP pathway. Data were obtained at two  
755 timepoints during exponential growth: at  $\text{OD}_{600}$  of 0.5-0.6 (T1) and at  $\text{OD}_{600}$  of 0.9-1.0 (T2).  
756 Labeling color legend: nonlabeled carbon (light blue), one  $^{13}\text{C}$ -carbon (orange), two  $^{13}\text{C}$ -carbons  
757 (cream), three  $^{13}\text{C}$ -carbons (green), four  $^{13}\text{C}$ -carbons (red), five  $^{13}\text{C}$ -carbons (purple), six  $^{13}\text{C}$ -  
758 carbons (dark blue), and seven  $^{13}\text{C}$ -carbons (grey). NF, not found. Labeling data (average  $\pm$   
759 standard deviation) were from biological replicates ( $n = 3$ ). Very small error bars are not  
760 noticeable. The abbreviations used are given in the legend of Fig. 1 and Fig. 3.

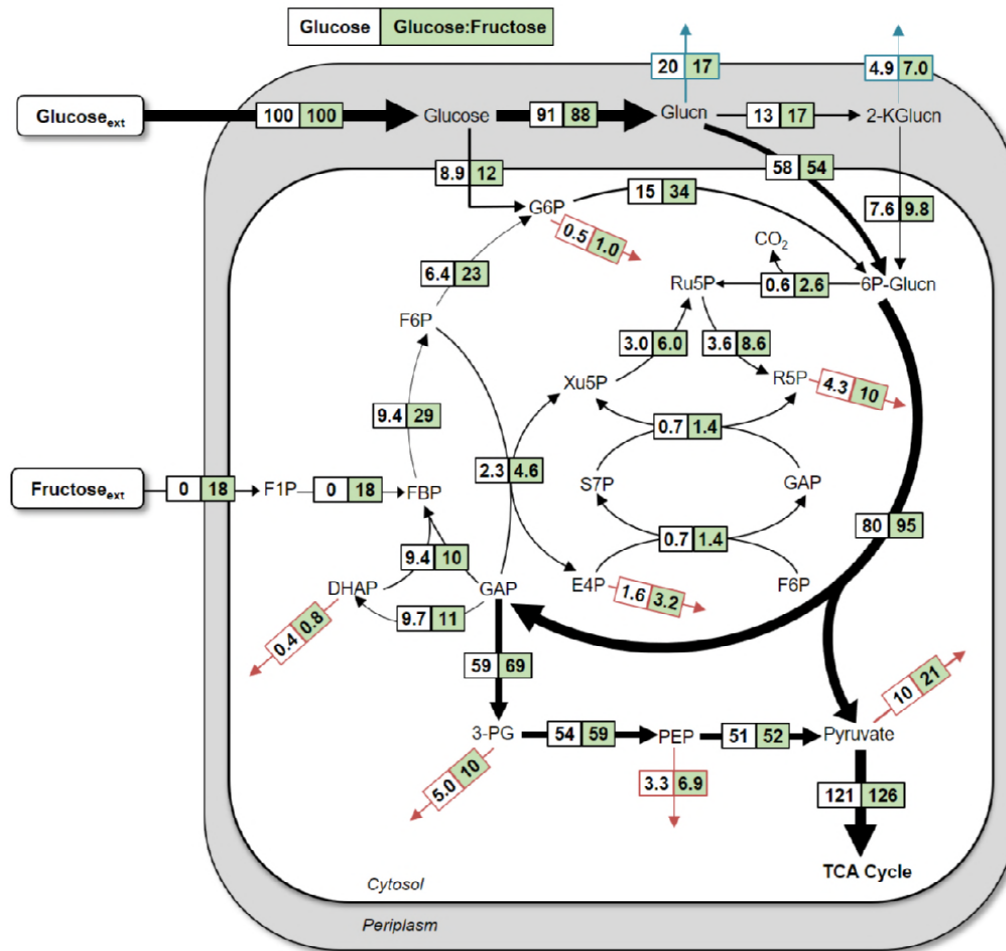

761

762 **FIG 7.** Quantitative metabolic flux analysis of *P. protegens* Pf-5 using metabolite labeling data  
 763 following growth on [U-<sup>13</sup>C<sub>6</sub>]-glucose:unlabeled glucose (white) or [U-<sup>13</sup>C<sub>6</sub>]-glucose:unlabeled  
 764 fructose (green). All fluxes were normalized to 100% glucose uptake and the thickness of each  
 765 arrow was scaled to the relative flux percentage for the glucose-only growth condition. The  
 766 absolute fluxes (mean ± standard deviation) are listed in Table S5 and S7. Red arrows indicate  
 767 contribution to biomass and blue arrows indicate excretion fluxes. The metabolite  
 768 abbreviations are as given in the legends of Fig. 1 and Fig. 3.

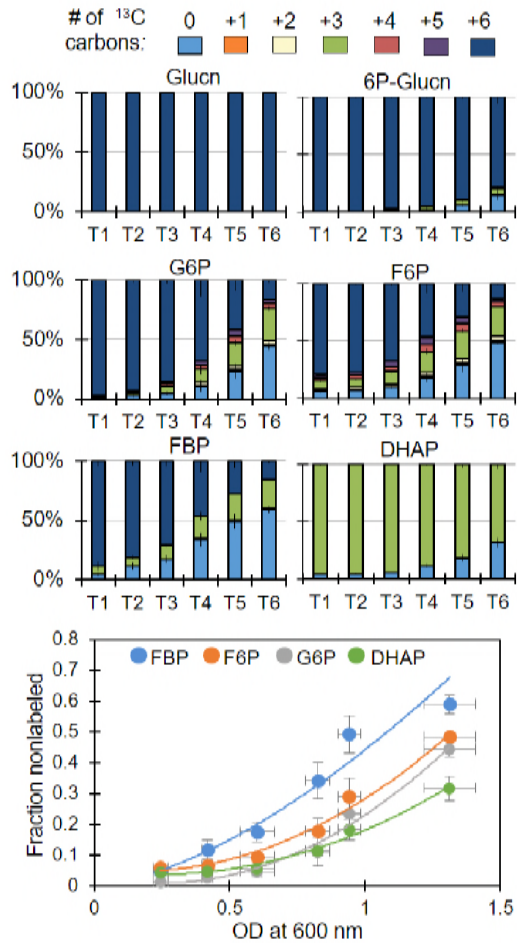

769

770 **FIG 8.** Kinetic profiling of metabolite labeling patterns in cells grown on [U-<sup>13</sup>C<sub>6</sub>]-glucose and  
771 unlabeled mannose. Labeling color legend: nonlabeled carbon (light blue), one <sup>13</sup>C-carbon  
772 (orange), two <sup>13</sup>C-carbons (cream), three <sup>13</sup>C-carbons (green), four <sup>13</sup>C-carbons (red), five <sup>13</sup>C-  
773 carbons (purple), six <sup>13</sup>C-carbons (dark blue). Data were obtained at six timepoints during  
774 exponential growth: at OD<sub>600</sub> of 0.21-0.27 (T1), at OD<sub>600</sub> of 0.40-.44 (T2), at OD<sub>600</sub> of 0.54-0.67  
775 (T3), at OD<sub>600</sub> of 0.79-.87 (T4), at OD<sub>600</sub> of 0.90-0.98 (T5), and at OD<sub>600</sub> of 1.2-1.4 (T6). The data  
776 (average ± standard deviation) are from biological replicates (*n* = 3). The lines through the data  
777 in the bottom figure represent guide to the eye. The metabolite abbreviations are as given in  
778 the legends of Fig. 1.
